# Supplementary material for: The role of diet in renal cell carcinoma incidence: an umbrella review of meta-analyses of observational studies
Source: Springer Nature journal article supplement (doi:10.1186/s12916-021-02229-5), 2022-02-03
Supplement: MOESM1 [file 20098006]

## **Additional File 1**

**Table S1:** Embase Search Strategy

**Table S2:** Data extraction form for included systematic reviews and individual studies

**Table S3:** Citation matrices for meta-analyses with overlapping associations

**Table S4:** List of excluded studies and reasons for their exclusion

**Table S5:** AMSTAR 2 quality appraisal scores

**Table S6:** General characteristics of meta-analyses with overlapping associations

**Table S7:** A. List of studies included in analysis B. List of meta-analyses with overlapping associations excluded from analysis

**Table S8:** Characteristics of the conducted meta-analyses and results of the recalculation, the methodological assessment (AMSTAR 2), and the level of evidence by exposure

**Table S9:** Summary of results of the associations on various dietary factors and risk of RCC by study design

**Table S10:** Summary of results of the associations on various dietary factors and risk of RCC by region

**Table S11:** Sensitivity analysis and the level of evidence of the association of vegetables and vitamin C with RCC.

**Table S1: Embase Search Strategy**

| Concept | Search Strategy          | Results |
|---------|--------------------------|---------|
| #01     | 'diet'/exp               | 367889  |
| #02     | 'dietetics'/exp          | 6931    |
| #03     | 'nutrient'/exp           | 54589   |
| #04     | 'food'/exp               | 1134670 |
| #05     | 'beverage'/exp           | 246641  |
| #06     | 'bread'/exp              | 8713    |
| #07     | 'food grain'/exp         | 157593  |
| #08     | 'maize'/exp              | 41250   |
| #09     | 'soybean'/exp            | 31855   |
| #10     | 'potato'/exp             | 14643   |
| #11     | 'plant tuber'/exp        | 2054    |
| #12     | 'fabaceae'/exp           | 108047  |
| #13     | 'lentil'/exp             | 1663    |
| #14     | 'vigna'/exp              | 3088    |
| #15     | 'cicer'/exp              | 2214    |
| #16     | 'oryza'/exp              | 43895   |
| #17     | 'chenopodium quinoa'/exp | 775     |
| #18     | 'vegetable'/exp          | 217186  |
| #19     | 'fruit'/exp              | 148745  |
| #20     | 'milk'/exp               | 80588   |
| #21     | 'dairy product'/exp      | 116725  |
| #22     | 'yoghurt'/exp            | 5950    |
| #23     | 'cheese'/exp             | 11285   |
| #24     | 'egg'/exp                | 40806   |
| #25     | 'meat'/exp               | 57722   |
| #26     | 'pork'/exp               | 3473    |
| #27     | 'chicken'/exp            | 140770  |
| #28     | 'duck'/exp               | 10779   |
| #29     | 'fish'/exp               | 250135  |
| #30     | 'sea food'/exp           | 18248   |
| #31     | 'shellfish'/exp          | 6212    |
| #32     | 'butter'/exp             | 3427    |
| #33     | 'margarine'/exp          | 1713    |
| #34     | 'nut'/exp                | 21189   |
| #35     | 'candy'/exp              | 1511    |
| #36     | 'carbohydrate'/exp       | 1015385 |
| #37     | 'alcohol'/exp            | 275102  |
| #38     | 'caffeine'/exp           | 50270   |
| #39     | 'coffee'/exp             | 15903   |
| #40     | 'tea'/exp                | 20576   |
| #41     | 'beer'/exp               | 7628    |

|     |                                                                                                                                                                                                                                                                                                                                                                                                                                                                                                                                                                                                                                                                                                                                                                                                                                                                                                                                                                                                                                                                                                                                                                                                                                                                                                                                                                                                                                                                                                                                                                                                                                                                                                                                                                                                                                                                                                                                                                                                                                                                       |         |
|-----|-----------------------------------------------------------------------------------------------------------------------------------------------------------------------------------------------------------------------------------------------------------------------------------------------------------------------------------------------------------------------------------------------------------------------------------------------------------------------------------------------------------------------------------------------------------------------------------------------------------------------------------------------------------------------------------------------------------------------------------------------------------------------------------------------------------------------------------------------------------------------------------------------------------------------------------------------------------------------------------------------------------------------------------------------------------------------------------------------------------------------------------------------------------------------------------------------------------------------------------------------------------------------------------------------------------------------------------------------------------------------------------------------------------------------------------------------------------------------------------------------------------------------------------------------------------------------------------------------------------------------------------------------------------------------------------------------------------------------------------------------------------------------------------------------------------------------------------------------------------------------------------------------------------------------------------------------------------------------------------------------------------------------------------------------------------------------|---------|
| #42 | 'drinking'/exp                                                                                                                                                                                                                                                                                                                                                                                                                                                                                                                                                                                                                                                                                                                                                                                                                                                                                                                                                                                                                                                                                                                                                                                                                                                                                                                                                                                                                                                                                                                                                                                                                                                                                                                                                                                                                                                                                                                                                                                                                                                        | 26173   |
| #43 | 'wine'/exp                                                                                                                                                                                                                                                                                                                                                                                                                                                                                                                                                                                                                                                                                                                                                                                                                                                                                                                                                                                                                                                                                                                                                                                                                                                                                                                                                                                                                                                                                                                                                                                                                                                                                                                                                                                                                                                                                                                                                                                                                                                            | 17994   |
| #44 | 'sugar-sweetened beverage'/exp                                                                                                                                                                                                                                                                                                                                                                                                                                                                                                                                                                                                                                                                                                                                                                                                                                                                                                                                                                                                                                                                                                                                                                                                                                                                                                                                                                                                                                                                                                                                                                                                                                                                                                                                                                                                                                                                                                                                                                                                                                        | 2080    |
| #45 | 'fatty acid'/exp                                                                                                                                                                                                                                                                                                                                                                                                                                                                                                                                                                                                                                                                                                                                                                                                                                                                                                                                                                                                                                                                                                                                                                                                                                                                                                                                                                                                                                                                                                                                                                                                                                                                                                                                                                                                                                                                                                                                                                                                                                                      | 617035  |
| #46 | 'dietary fiber'/exp                                                                                                                                                                                                                                                                                                                                                                                                                                                                                                                                                                                                                                                                                                                                                                                                                                                                                                                                                                                                                                                                                                                                                                                                                                                                                                                                                                                                                                                                                                                                                                                                                                                                                                                                                                                                                                                                                                                                                                                                                                                   | 31377   |
| #47 | 'starch'/exp                                                                                                                                                                                                                                                                                                                                                                                                                                                                                                                                                                                                                                                                                                                                                                                                                                                                                                                                                                                                                                                                                                                                                                                                                                                                                                                                                                                                                                                                                                                                                                                                                                                                                                                                                                                                                                                                                                                                                                                                                                                          | 32064   |
| #48 | 'fructose'/exp                                                                                                                                                                                                                                                                                                                                                                                                                                                                                                                                                                                                                                                                                                                                                                                                                                                                                                                                                                                                                                                                                                                                                                                                                                                                                                                                                                                                                                                                                                                                                                                                                                                                                                                                                                                                                                                                                                                                                                                                                                                        | 26803   |
| #49 | 'protein'/exp                                                                                                                                                                                                                                                                                                                                                                                                                                                                                                                                                                                                                                                                                                                                                                                                                                                                                                                                                                                                                                                                                                                                                                                                                                                                                                                                                                                                                                                                                                                                                                                                                                                                                                                                                                                                                                                                                                                                                                                                                                                         | 494698  |
| #50 | 'vitamin'/exp                                                                                                                                                                                                                                                                                                                                                                                                                                                                                                                                                                                                                                                                                                                                                                                                                                                                                                                                                                                                                                                                                                                                                                                                                                                                                                                                                                                                                                                                                                                                                                                                                                                                                                                                                                                                                                                                                                                                                                                                                                                         | 708763  |
| #51 | 'mineral'/exp                                                                                                                                                                                                                                                                                                                                                                                                                                                                                                                                                                                                                                                                                                                                                                                                                                                                                                                                                                                                                                                                                                                                                                                                                                                                                                                                                                                                                                                                                                                                                                                                                                                                                                                                                                                                                                                                                                                                                                                                                                                         | 46090   |
| #52 | #1 OR #2 OR #3 OR #4 OR #5 OR #6 OR #7 OR #8 OR #9 OR #10<br>OR #11 OR #12 OR #13 OR #14 OR #15 OR #16 OR #17 OR #18 OR<br>#19 OR #20 OR #21 OR #22 OR #23 OR #24 OR #25 OR #26 OR #27<br>OR #28 OR #29 OR #30 OR #31 OR #32 OR #33 OR #34 OR #35 OR<br>#36 OR #37 OR #38 OR #39 OR #40 OR #41 OR #42 OR #43 OR #44<br>OR #45 OR #46 OR #47 OR #48 OR #49 OR #50 OR #51                                                                                                                                                                                                                                                                                                                                                                                                                                                                                                                                                                                                                                                                                                                                                                                                                                                                                                                                                                                                                                                                                                                                                                                                                                                                                                                                                                                                                                                                                                                                                                                                                                                                                               | 4292156 |
| #53 | 'diets':ab,ti OR 'nutrients':ab,ti OR 'macronutrients':ab,ti OR<br>'macronutrient':ab,ti OR 'foods':ab,ti OR 'beverages':ab,ti OR<br>'breads':ab,ti OR 'edible grain*':ab,ti OR 'grain, edible':ab,ti OR 'grains,<br>edible':ab,ti OR 'cereal grain':ab,ti OR 'cereal grains':ab,ti OR<br>'grain, cereal':ab,ti OR 'grains, cereal':ab,ti OR 'cereals':ab,ti OR<br>'cereal':ab,ti OR 'zea':ab,ti OR 'corn':ab,ti OR 'indian corn':ab,ti OR<br>'corn, indian':ab,ti OR 'maize':ab,ti OR 'teosinte':ab,ti OR<br>'soybeans':ab,ti OR 'soy beans':ab,ti OR 'bean, soy':ab,ti OR<br>'beans, soy':ab,ti OR 'soy bean':ab,ti OR 'glycine max':ab,ti OR<br>'soy':ab,ti OR 'soya':ab,ti OR 'solanum tuberosum*':ab,ti OR<br>'tuberosum, solanum':ab,ti OR 'tuberosums, solanum':ab,ti OR<br>'potatoes':ab,ti OR 'potato':ab,ti OR 'plant tubers':ab,ti OR 'tuber,<br>plant':ab,ti OR 'tubers, plant':ab,ti OR 'pulses':ab,ti OR 'legumes':ab,ti<br>OR 'legume':ab,ti OR 'leguminosae':ab,ti OR 'pea family':ab,ti OR<br>'families, pea':ab,ti OR 'family, pea':ab,ti OR 'pea families':ab,ti OR<br>'amorpha':ab,ti OR 'andira':ab,ti OR 'baptisia':ab,ti OR 'callerya':ab,ti<br>OR 'ceratonia':ab,ti OR 'clathrotropis':ab,ti OR 'tachigalia':ab,ti OR<br>'copaifera':ab,ti OR 'delonix':ab,ti OR 'euchresta':ab,ti OR<br>'guibourtia':ab,ti OR 'machaerium':ab,ti OR 'pithecellobium':ab,ti OR<br>'pithecolobium':ab,ti OR 'stryphnodendron':ab,ti OR 'afzelia':ab,ti OR<br>'colophospermum':ab,ti OR 'lens plant*':ab,ti OR 'plant, lens':ab,ti OR<br>'plants, lens':ab,ti OR 'lentils':ab,ti OR 'lentil':ab,ti OR 'lens<br>culinaris':ab,ti OR 'lens culinari':ab,ti OR 'culinari, lens':ab,ti OR<br>'cowpeas':ab,ti OR 'cowpea':ab,ti OR 'vigna angularis':ab,ti OR 'adzuki<br>bean':ab,ti OR 'adzuki beans':ab,ti OR 'bean, adzuki':ab,ti OR 'beans,<br>adzuki':ab,ti OR 'vigna aconitifolia':ab,ti OR 'moth bean':ab,ti OR<br>'bean, moth':ab,ti OR 'beans, moth':ab,ti OR 'moth beans':ab,ti OR<br>'vigna radiata':ab,ti OR 'mung beans':ab,ti OR 'bean, mung':ab,ti OR | 3582831 |

---

'beans, mung':ab,ti OR 'mung bean':ab,ti OR 'vigna unguiculata':ab,ti OR 'blackeyed pea':ab,ti OR 'blackeyed peas':ab,ti OR 'pea, blackeyed':ab,ti OR 'peas, blackeyed':ab,ti OR 'vigna mungo':ab,ti OR 'phaseolus mungo':ab,ti OR 'black gram':ab,ti OR 'gram, black':ab,ti OR 'vigna umbellata':ab,ti OR 'rice bean':ab,ti OR 'bean, rice':ab,ti OR 'beans, rice':ab,ti OR 'rice beans':ab,ti OR 'cicers':ab,ti OR 'cicer arietinum':ab,ti OR 'cicer arietinums':ab,ti OR 'arietinum, cicer':ab,ti OR 'chickpea':ab,ti OR 'chickpeas':ab,ti OR 'garbanzo':ab,ti OR 'garbanzos':ab,ti OR 'rice':ab,ti OR 'rices':ab,ti OR 'oryza sativa':ab,ti OR 'chenopodium quinoas':ab,ti OR 'quinoa, chenopodium':ab,ti OR 'quinoa':ab,ti OR 'quinoas':ab,ti OR 'vegetables':ab,ti OR 'fruits':ab,ti OR 'plant capsule':ab,ti OR 'capsule, plant':ab,ti OR 'capsules, plant':ab,ti OR 'plant capsules':ab,ti OR 'plant aril':ab,ti OR 'aril, plant':ab,ti OR 'arils, plant':ab,ti OR 'plant arils':ab,ti OR 'berries':ab,ti OR 'berry':ab,ti OR 'legume pod':ab,ti OR 'legume pods':ab,ti OR 'pod, legume':ab,ti OR 'pods, legume':ab,ti OR 'breast milk':ab,ti OR 'milk, breast':ab,ti OR 'human milk':ab,ti OR 'cow milk':ab,ti OR 'milk, cow':ab,ti OR 'dairy products':ab,ti OR 'product, dairy':ab,ti OR 'products, dairy':ab,ti OR 'yogurt':ab,ti OR 'cheeses':ab,ti OR 'eggs':ab,ti OR 'meats':ab,ti OR 'meat, pork':ab,ti OR 'meats, pork':ab,ti OR 'pork meats':ab,ti OR 'pig meat':ab,ti OR 'meat, pig':ab,ti OR 'meats, pig':ab,ti OR 'pig meats':ab,ti OR 'pork':ab,ti OR 'bacon':ab,ti OR 'cured ham':ab,ti OR 'ham, cured':ab,ti OR 'chickens':ab,ti OR 'gallus gallus domesticus':ab,ti OR 'gallus domesticus':ab,ti OR 'gallus gallus':ab,ti OR 'ducks':ab,ti OR 'fishes':ab,ti OR 'seafoods':ab,ti OR 'sea-food':ab,ti OR 'sea food':ab,ti OR 'sea-foods':ab,ti OR 'brachyura':ab,ti OR 'astacoidea':ab,ti OR 'nephropidae':ab,ti OR 'cephalopoda':ab,ti OR 'gastropoda':ab,ti OR 'bivalvia':ab,ti OR 'oil':ab,ti OR 'butters':ab,ti OR 'nuts':ab,ti OR 'dessert':ab,ti OR 'sweets':ab,ti OR 'sweetened':ab,ti OR 'candies':ab,ti OR 'confection':ab,ti OR 'confections':ab,ti OR 'caramel candy':ab,ti OR 'candies, caramel':ab,ti OR 'candy, caramel':ab,ti OR 'caramel candies':ab,ti OR 'sugar\*':ab,ti OR 'alcohols':ab,ti OR '1,3,7-trimethylxanthine':ab,ti OR 'vivarin':ab,ti OR 'caffedrine':ab,ti OR 'coffeinum n':ab,ti OR 'percutaféine':ab,ti OR 'dexitac':ab,ti OR 'durvitan':ab,ti OR 'no doz':ab,ti OR 'percoffedrinol n':ab,ti OR 'quick-pep':ab,ti OR 'quick pep':ab,ti OR 'quickpep':ab,ti OR 'coffeinum purrum':ab,ti OR 'caffeine':ab,ti OR 'chicory':ab,ti OR 'coffea':ab,ti OR 'black tea':ab,ti OR 'black teas':ab,ti OR 'tea, black':ab,ti OR 'teas, black':ab,ti OR 'green tea':ab,ti OR 'green teas':ab,ti OR 'tea, green':ab,ti OR 'teas, green':ab,ti OR 'beers':ab,ti OR 'drinkings':ab,ti OR 'water consumption':ab,ti OR 'water intake':ab,ti OR 'wines':ab,ti OR 'beverage, sugar-sweetened':ab,ti OR 'beverages, sugar-sweetened':ab,ti OR 'sugar-sweetened beverage':ab,ti OR 'sugar-added

---

beverages':ab,ti OR 'sugar added beverages':ab,ti OR 'sugar sweetened beverage':ab,ti OR 'beverage, sugar sweetened':ab,ti OR 'beverages, sugar sweetened':ab,ti OR 'sugar sweetened beverages':ab,ti OR 'sweetened beverage, sugar':ab,ti OR 'sweetened beverages, sugar':ab,ti OR 'sugar-added beverage':ab,ti OR 'beverage, sugar-added':ab,ti OR 'beverages, sugar-added':ab,ti OR 'sugar added beverage':ab,ti OR 'sweetened drinks':ab,ti OR 'sweetened drink':ab,ti OR 'drink, sweetened':ab,ti OR 'drinks, sweetened':ab,ti OR 'sugar-sweetened soft drinks':ab,ti OR 'sugar sweetened soft drinks':ab,ti OR 'sugar-sweetened soft drink':ab,ti OR 'drink, sugar-sweetened soft':ab,ti OR 'drinks, sugar-sweetened soft':ab,ti OR 'soft drink, sugar-sweetened':ab,ti OR 'soft drinks, sugar-sweetened':ab,ti OR 'sugar sweetened soft drink':ab,ti OR 'sweetened beverages':ab,ti OR 'sweetened beverage':ab,ti OR 'beverage, sweetened':ab,ti OR 'beverages, sweetened':ab,ti OR 'sugar-sweetened sodas':ab,ti OR 'sugar sweetened sodas':ab,ti OR 'sugar-sweetened soda':ab,ti OR 'soda, sugar-sweetened':ab,ti OR 'sodas, sugar-sweetened':ab,ti OR 'sugar sweetened soda':ab,ti OR 'fatty acid':ab,ti OR 'fatty acids, esterified':ab,ti OR 'esterified fatty acids':ab,ti OR 'esterified fatty acid':ab,ti OR 'acid, esterified fatty':ab,ti OR 'fatty acid, esterified':ab,ti OR 'fatty acids, saturated':ab,ti OR 'saturated fatty acids':ab,ti OR 'saturated fatty acid':ab,ti OR 'acid, saturated fatty':ab,ti OR 'fatty acid, saturated':ab,ti OR 'aliphatic acids':ab,ti OR 'aliphatic acid':ab,ti OR 'acid, aliphatic':ab,ti OR 'carbohydrate':ab,ti OR 'dietary fibers':ab,ti OR 'fibers, dietary':ab,ti OR 'fiber, dietary':ab,ti OR 'wheat bran':ab,ti OR 'bran, wheat':ab,ti OR 'brans, wheat':ab,ti OR 'roughage':ab,ti OR 'roughages':ab,ti OR 'keoflo':ab,ti OR 'cornstarch':ab,ti OR 'amylomaize starch':ab,ti OR 'starch, amylomaize':ab,ti OR 'amylum':ab,ti OR 'sugar':ab,ti OR 'levulose':ab,ti OR 'fleboplast levulosa':ab,ti OR 'levulosa, fleboplast':ab,ti OR 'levulosa grifols':ab,ti OR 'levulosado vitulia':ab,ti OR 'levulosa braun':ab,ti OR 'levulosado braun':ab,ti OR 'levulosa ife':ab,ti OR 'levulosado bieffe medit':ab,ti OR 'apir levulosa':ab,ti OR 'levulosa, apir':ab,ti OR 'levulosa mein':ab,ti OR 'plast apyr levulosa mein':ab,ti OR 'levulosa ibys':ab,ti OR 'levulosa baxter':ab,ti OR 'levulosa':ab,ti OR 'proteins':ab,ti OR 'gene products, protein':ab,ti OR 'protein gene products':ab,ti OR 'gene proteins':ab,ti OR 'proteins, gene':ab,ti OR 'micronutrient':ab,ti OR 'vitamins':ab,ti OR 'minerals':ab,ti OR 'dietary':ab,ti OR 'nutrition':ab,ti OR 'food group':ab,ti OR 'food cluster':ab,ti OR 'grain':ab,ti OR 'wholegrain':ab,ti OR 'whole wheat':ab,ti OR 'granary':ab,ti OR 'tuber':ab,ti OR 'tubers':ab,ti OR 'beans':ab,ti OR 'pasta':ab,ti OR 'dairy':ab,ti OR 'pork meat':ab,ti OR 'lamb':ab,ti OR 'beef':ab,ti OR 'turkey':ab,ti OR 'carbohydrate\*':ab,ti OR 'juice':ab,ti OR 'lemonade':ab,ti OR 'drinks':ab,ti OR 'liquor':ab,ti OR 'fat':ab,ti OR

---

|     |                                                                                                                                                                                                                                                                                                                                                                                                                                                                                                                                                                                                                                                                                                                                                                                                                                                                                                                                                                                                                                                                                                                                                                                                                                                                                                                                                                                                                                                                                                                                                                                                                                                                                                                |         |
|-----|----------------------------------------------------------------------------------------------------------------------------------------------------------------------------------------------------------------------------------------------------------------------------------------------------------------------------------------------------------------------------------------------------------------------------------------------------------------------------------------------------------------------------------------------------------------------------------------------------------------------------------------------------------------------------------------------------------------------------------------------------------------------------------------------------------------------------------------------------------------------------------------------------------------------------------------------------------------------------------------------------------------------------------------------------------------------------------------------------------------------------------------------------------------------------------------------------------------------------------------------------------------------------------------------------------------------------------------------------------------------------------------------------------------------------------------------------------------------------------------------------------------------------------------------------------------------------------------------------------------------------------------------------------------------------------------------------------------|---------|
|     | 'fiber':ab,ti OR 'zea mays':ab,ti                                                                                                                                                                                                                                                                                                                                                                                                                                                                                                                                                                                                                                                                                                                                                                                                                                                                                                                                                                                                                                                                                                                                                                                                                                                                                                                                                                                                                                                                                                                                                                                                                                                                              |         |
| #54 | #52 OR #53                                                                                                                                                                                                                                                                                                                                                                                                                                                                                                                                                                                                                                                                                                                                                                                                                                                                                                                                                                                                                                                                                                                                                                                                                                                                                                                                                                                                                                                                                                                                                                                                                                                                                                     | 6377703 |
| #55 | 'renal cell carcinoma'/exp                                                                                                                                                                                                                                                                                                                                                                                                                                                                                                                                                                                                                                                                                                                                                                                                                                                                                                                                                                                                                                                                                                                                                                                                                                                                                                                                                                                                                                                                                                                                                                                                                                                                                     | 16593   |
| #56 | 'carcinoma, renal cell':ab,ti OR 'carcinomas, renal cell':ab,ti OR 'renal cell carcinomas':ab,ti OR 'nephroid carcinoma':ab,ti OR 'carcinoma, nephroid':ab,ti OR 'nephroid carcinomas':ab,ti OR 'adenocarcinoma of kidney':ab,ti OR 'adenocarcinoma of kidneys':ab,ti OR 'kidney, adenocarcinoma of':ab,ti OR 'renal cell carcinoma':ab,ti OR 'renal cell cancer':ab,ti OR 'cancer, renal cell':ab,ti OR 'renal cell cancers':ab,ti OR 'adenocarcinoma, renal':ab,ti OR 'renal adenocarcinoma':ab,ti OR 'renal adenocarcinomas':ab,ti OR 'renal carcinoma':ab,ti OR 'carcinoma, renal':ab,ti OR 'renal carcinomas':ab,ti OR 'adenocarcinoma, renal cell':ab,ti OR 'adenocarcinomas, renal cell':ab,ti OR 'renal cell adenocarcinoma':ab,ti OR 'renal cell adenocarcinomas':ab,ti OR 'chromophobe renal cell carcinoma':ab,ti OR 'sarcomatoid renal cell carcinoma':ab,ti OR 'papillary renal cell carcinoma':ab,ti OR 'renal cell carcinoma, papillary':ab,ti OR 'chromophil renal cell carcinoma':ab,ti OR 'clear cell renal cell carcinoma':ab,ti OR 'grawitz tumor':ab,ti OR 'tumor, grawitz':ab,ti OR 'clear cell renal carcinoma':ab,ti OR 'carcinoma, hypernephroid':ab,ti OR 'hypernephroid carcinoma':ab,ti OR 'hypernephroid carcinomas':ab,ti OR 'hypernephroma':ab,ti OR 'hypernephromas':ab,ti OR 'carcinoma, collecting duct (kidney)':ab,ti OR 'carcinomas, collecting duct (kidney)':ab,ti OR 'collecting duct carcinomas (kidney)':ab,ti OR 'collecting duct carcinoma of the kidney':ab,ti OR 'renal collecting duct carcinoma':ab,ti OR 'collecting duct carcinoma':ab,ti OR 'carcinoma, collecting duct':ab,ti OR 'carcinomas, collecting duct':ab,ti OR 'collecting duct carcinomas':ab,ti | 69330   |
| #57 | #55 OR #56                                                                                                                                                                                                                                                                                                                                                                                                                                                                                                                                                                                                                                                                                                                                                                                                                                                                                                                                                                                                                                                                                                                                                                                                                                                                                                                                                                                                                                                                                                                                                                                                                                                                                                     | 73229   |
| #58 | systematic:ab,ti AND review*:ab,ti                                                                                                                                                                                                                                                                                                                                                                                                                                                                                                                                                                                                                                                                                                                                                                                                                                                                                                                                                                                                                                                                                                                                                                                                                                                                                                                                                                                                                                                                                                                                                                                                                                                                             | 293813  |
| #59 | medline:ab,ti OR 'meta analysis':ab,ti OR 'meta analysis':it                                                                                                                                                                                                                                                                                                                                                                                                                                                                                                                                                                                                                                                                                                                                                                                                                                                                                                                                                                                                                                                                                                                                                                                                                                                                                                                                                                                                                                                                                                                                                                                                                                                   | 324884  |
| #60 | #58 OR #59                                                                                                                                                                                                                                                                                                                                                                                                                                                                                                                                                                                                                                                                                                                                                                                                                                                                                                                                                                                                                                                                                                                                                                                                                                                                                                                                                                                                                                                                                                                                                                                                                                                                                                     | 469327  |
| #61 | #54 AND #57 AND #60                                                                                                                                                                                                                                                                                                                                                                                                                                                                                                                                                                                                                                                                                                                                                                                                                                                                                                                                                                                                                                                                                                                                                                                                                                                                                                                                                                                                                                                                                                                                                                                                                                                                                            | 142     |

---

**Table S2: Data extraction from included systematic reviews and individual studies**

A: Data extraction form for included systematic reviews

| <b>Systematic reviews</b>                                                    |  |
|------------------------------------------------------------------------------|--|
| Title                                                                        |  |
| Name of the first author                                                     |  |
| Publication year                                                             |  |
| Exposure (including dose of exposure)                                        |  |
| No. of included studies                                                      |  |
| study design of the Individual studies                                       |  |
| No. of cohort study                                                          |  |
| No. of case control study                                                    |  |
| No. of pooled study                                                          |  |
| Effects model                                                                |  |
| No. of participants / No. of cases                                           |  |
| MA metric                                                                    |  |
| Estimates                                                                    |  |
| 95%CI                                                                        |  |
| Type of comparison (high v low meta-analysis or dose-response meta-analysis) |  |
| Range / Amount                                                               |  |
| Quality score of Individual studies(mean) if reported                        |  |
| Publication bias                                                             |  |
| Heterogeneity                                                                |  |
| Information on funding                                                       |  |
| Conflict of interest                                                         |  |

MA: meta-analysis; CI: confidence intervals

B: Data extraction form for included individual studies

| <b>Individual studies</b>                                          |  |
|--------------------------------------------------------------------|--|
| Name of the first author                                           |  |
| Year of publication                                                |  |
| Exposure (including dose of exposure)                              |  |
| Number of total cases                                              |  |
| Number of participants                                             |  |
| Hazard ratios (that adjust for the most confounders if reported) * |  |
| 95%CI*                                                             |  |

CI: confidence intervals; \*: the data are used to estimate the statistical power of each individual study and to estimate excess significant bias.

The data extraction table is adapted from the data extraction table recommended by Joanna Briggs Institute.

**Table S3: Citation matrices for meta-analyses with overlapping associations**

**A. Poultry**

| <b>Meta-analysis</b>                                | Faramawi 2007        | Lee 2008             |
|-----------------------------------------------------|----------------------|----------------------|
| <b>Overlapping associations</b>                     | Renal cell carcinoma | Renal cell carcinoma |
| <b>Individual study</b>                             |                      |                      |
| Chow 1994                                           | X                    |                      |
| Lindblad 1997                                       | X                    |                      |
| Maclure 1990                                        | X                    |                      |
| Hu 2003                                             | X                    |                      |
| Nicodemus 2004                                      |                      | X                    |
| Lin 2005                                            |                      | X                    |
| Lee 2006                                            |                      | X                    |
| Bernstein 2002                                      |                      | X                    |
| van Dijk 2005                                       |                      | X                    |
| Wolk 2006                                           |                      | X                    |
| Giles 2002                                          |                      | X                    |
| Rohan 2002                                          |                      | X                    |
| Mahabir 2005                                        |                      | X                    |
| Calle 2002                                          |                      | X                    |
| Flood 2002                                          |                      | X                    |
| <b>Total (No of publications per meta-analysis)</b> | <b>4</b>             | <b>11</b>            |
| <b>Grand Total (N)</b>                              | <b>15</b>            |                      |
| <b>Rows (r)</b>                                     | <b>15</b>            |                      |
| <b>Columns (c)</b>                                  | <b>2</b>             |                      |
| <b>Corrected covered area (CCA)</b>                 | <b>0</b>             |                      |

Formula for calculating the corrected covered area,  $CCA (\%) = N - r / rc - r$

Where N = number of included publications (sum of checked boxes), r = number of rows (Individual publications), c = number of columns (number of meta-analyses).



## B. Cruciferous Vegetables

| Meta-analysis                                       | Liu 2013             | Zhao 2013            |
|-----------------------------------------------------|----------------------|----------------------|
| <b>Overlapping associations</b>                     | Renal cell carcinoma | Renal cell carcinoma |
| <b>Individual study</b>                             |                      |                      |
| Wolk 1996                                           | X                    |                      |
| Mellemgaard 1996                                    | X                    |                      |
| Lindblad 1997                                       | X                    | X                    |
| Yuan 1998                                           | X                    | X                    |
| Hu 2003                                             | X                    | X                    |
| van Dijk 2005                                       | X                    | X                    |
| Lee 2006                                            | X                    | X                    |
| Hsu 2007                                            | X                    | X                    |
| Bertoia 2010                                        | X                    | X                    |
| Brock 2011                                          | X                    |                      |
| Daniel 2013                                         |                      | X                    |
| Brock 2012                                          |                      | X                    |
| Maclure 1990                                        |                      | X                    |
| Weikert 2006                                        |                      | X                    |
| Rashidkhani 2005                                    |                      | X                    |
| <b>Total (No of publications per meta-analysis)</b> | <b>10</b>            | <b>12</b>            |
| <b>Grand Total (N)</b>                              | <b>22</b>            |                      |
| <b>Rows (r)</b>                                     | <b>15</b>            |                      |
| <b>Columns (c)</b>                                  | <b>2</b>             |                      |
| <b>Corrected covered area (CCA)</b>                 | <b>46.70%</b>        |                      |

Formula for calculating the corrected covered area,  $CCA (\%) = N - r / rc - r$

Where N = number of included publications (sum of checked boxes), r = number of rows (Individual publications), c = number of columns (number of meta-analyses).

### C. Vitamin E

| Meta-analysis                                       | Shang 2015           | Shen 2015            |
|-----------------------------------------------------|----------------------|----------------------|
| <b>Overlapping associations</b>                     | Renal cell carcinoma | Renal cell carcinoma |
| <b>Individual study</b>                             |                      |                      |
| Bosetti 2006                                        | X                    |                      |
| Wolk 1996                                           | X                    | X                    |
| Lindblad 1997                                       | X                    | X                    |
| Chow 1994                                           | X                    | X                    |
| Mellemgaard 1996                                    | X                    | X                    |
| Hu 2003                                             | X                    | X                    |
| Hu 2009                                             | X                    | X                    |
| Prineas 1997                                        |                      | X                    |
| Nicodemus 2004                                      |                      | X                    |
| Lee 2006                                            |                      | X                    |
| Bosetti 2007                                        |                      | X                    |
| van Dijk 2008                                       |                      | X                    |
| Bertoia 2010                                        |                      | X                    |
| Ho 2015                                             |                      | X                    |
| <b>Total (No of publications per meta-analysis)</b> | <b>7</b>             | <b>13</b>            |
| <b>Grand Total (N)</b>                              | <b>20</b>            |                      |
| <b>Rows (r)</b>                                     | <b>14</b>            |                      |
| <b>Columns (c)</b>                                  | <b>2</b>             |                      |
| <b>Corrected covered area (CCA)</b>                 | <b>42.90%</b>        |                      |

Formula for calculating the corrected covered area,  $CCA (\%) = N - r / rc - r$

Where N = number of included publications (sum of checked boxes), r = number of rows (Individual publications), c = number of columns (number of meta-analyses).

## D. Red meat

| <b>Meta-analysis</b>            | Alexander 2009       | Faramawi 2007        | Lee 2008             | Zhang 2017           |
|---------------------------------|----------------------|----------------------|----------------------|----------------------|
| <b>Overlapping associations</b> | Renal cell carcinoma | Renal cell carcinoma | Renal cell carcinoma | Renal cell carcinoma |
| <b>Individual study</b>         |                      |                      |                      |                      |
| Bravi 2007                      | X                    |                      |                      | X                    |
| Cross 2007                      | X                    |                      |                      |                      |
| De Stefani 1998                 | X                    | X                    |                      | X                    |
| Fraser 1990                     | X                    |                      |                      | X                    |
| Hsu 2007                        | X                    |                      |                      | X                    |
| Hu 2003                         | X                    | X                    |                      | X                    |
| MaClure 1990                    | X                    | X                    |                      | X                    |
| Talamini 1990                   | X                    |                      |                      |                      |
| Washio 2005                     | X                    |                      |                      | X                    |
| Wolk 1996                       | X                    |                      |                      | X                    |
| Lee 2008                        | X                    |                      |                      | X                    |
| Tavani 2000                     |                      | X                    |                      | X                    |
| Chow 1994                       |                      | X                    |                      | X                    |
| Handa 2002                      |                      | X                    |                      | X                    |
| Nicodemus 2004                  |                      |                      | X                    |                      |
| Lin 2005                        |                      |                      | X                    |                      |
| Lee 2006                        |                      |                      | X                    |                      |
| Bernstein 2002                  |                      |                      | X                    |                      |
| van Dijk 2005                   |                      |                      | X                    |                      |
| Wolk 2006                       |                      |                      | X                    |                      |
| Giles 2002                      |                      |                      | X                    |                      |
| Rohan 2002                      |                      |                      | X                    |                      |

|                                                     |               |          |           |           |
|-----------------------------------------------------|---------------|----------|-----------|-----------|
| Mahabir 2005                                        |               |          | X         |           |
| Bandera 2002                                        |               |          | X         |           |
| Calle 2002                                          |               |          | X         |           |
| Flood 2002                                          |               |          | X         |           |
| Rohmann 2015                                        |               |          |           | X         |
| Daniel 2012                                         |               |          |           | X         |
| Melkonian 2016                                      |               |          |           | X         |
| Aune 2009                                           |               |          |           | X         |
| Daniel 2011                                         |               |          |           | X         |
| Brock 2009                                          |               |          |           | X         |
| Grieb 2009                                          |               |          |           | X         |
| <b>Total (No of publications per meta-analysis)</b> | <b>11</b>     | <b>6</b> | <b>12</b> | <b>19</b> |
| <b>Grand Total (N)</b>                              | <b>48</b>     |          |           |           |
| <b>Rows (r)</b>                                     | <b>33</b>     |          |           |           |
| <b>Columns (c)</b>                                  | <b>4</b>      |          |           |           |
| <b>Corrected covered area (CCA)</b>                 | <b>15.20%</b> |          |           |           |

Formula for calculating the corrected covered area,  $CCA (\%) = N-r / rc-r$

Where N = number of included publications (sum of checked boxes), r = number of rows (Individual publications), c = number of columns (number of meta-analyses).

## E. Processed meat

| <b>Meta-analysis</b>            | Alexander 2009       | Faramawi 2007        | Lee 2008             | Zhang 2017           |
|---------------------------------|----------------------|----------------------|----------------------|----------------------|
| <b>Overlapping associations</b> | Renal cell carcinoma | Renal cell carcinoma | Renal cell carcinoma | Renal cell carcinoma |
| <b>Individual study</b>         |                      |                      |                      |                      |
| Bravi 2007                      | X                    |                      |                      | X                    |
| Cross 2007                      | X                    |                      |                      |                      |
| De Stefani 1998                 | X                    | X                    |                      | X                    |
| Hsu 2007                        | X                    |                      |                      | X                    |
| Hu 2003                         | X                    | X                    |                      | X                    |
| MaClure 1990                    | X                    | X                    |                      | X                    |
| Washio 2005                     | X                    |                      |                      | X                    |
| Wolk 1996                       | X                    |                      |                      | X                    |
| Yuan 1998                       | X                    |                      |                      | X                    |
| Lee 2008                        | X                    |                      |                      | X                    |
| Chow 1994                       |                      | X                    |                      | X                    |
| Nicodemus 2004                  |                      |                      | X                    |                      |
| Lin 2005                        |                      |                      | X                    |                      |
| Lee 2006                        |                      |                      | X                    |                      |
| Bernstein 2002                  |                      |                      | X                    |                      |
| van Dijk 2005                   |                      |                      | X                    |                      |
| Wolk 2006                       |                      |                      | X                    |                      |
| Giles 2002                      |                      |                      | X                    |                      |
| Rohan 2002                      |                      |                      | X                    |                      |
| Mahabir 2005                    |                      |                      | X                    |                      |
| Bandera 2002                    |                      |                      | X                    |                      |
| Calle 2002                      |                      |                      | X                    |                      |

|                                                     |               |          |           |           |
|-----------------------------------------------------|---------------|----------|-----------|-----------|
| Flood 2002                                          |               |          | X         |           |
| Rohrman 2015                                        |               |          |           | X         |
| Daniel 2012                                         |               |          |           | X         |
| De Stefani 2012                                     |               |          |           | X         |
| Aune 2009                                           |               |          |           | X         |
| Talamini 1990                                       |               |          |           | X         |
| Hu 2011                                             |               |          |           | X         |
| Daniel 2011                                         |               |          |           | X         |
| Brock 2009                                          |               |          |           | X         |
| Grieb 2009                                          |               |          |           | X         |
| <b>Total (No of publications per meta-analysis)</b> | <b>10</b>     | <b>4</b> | <b>12</b> | <b>19</b> |
| <b>Grand Total (N)</b>                              | <b>47</b>     |          |           |           |
| <b>Rows (r)</b>                                     | <b>32</b>     |          |           |           |
| <b>Columns (c)</b>                                  | <b>4</b>      |          |           |           |
| <b>Corrected covered area (CCA)</b>                 | <b>15.60%</b> |          |           |           |

Formula for calculating the corrected covered area,  $CCA (\%) = N-r / rc-r$

Where N = number of included publications (sum of checked boxes), r = number of rows (Individual publications), c = number of columns (number of meta-analyses)

## F. Alcohol

| <b>Meta-analysis</b>            | Bellocco 2012        | Cheng 2011           | Song 2012            | Xu 2015              | WCRF 2018            |
|---------------------------------|----------------------|----------------------|----------------------|----------------------|----------------------|
| <b>Overlapping associations</b> | Renal cell carcinoma | Renal cell carcinoma | Renal cell carcinoma | Renal cell carcinoma | Renal cell carcinoma |
| <b>Individual study</b>         |                      |                      |                      |                      |                      |
| Goodman 1986                    | X                    | X                    | X                    |                      |                      |
| Brownson 1988                   | X                    | X                    | X                    |                      |                      |
| Kreiger 1993                    | X                    | X                    | X                    |                      |                      |
| Benhamou 1993                   | X                    | X                    | X                    |                      |                      |
| Mellengaard 1994                | X                    |                      |                      |                      |                      |
| Wolk 1996                       | X                    | X                    | X                    |                      |                      |
| Lindblad 1997                   | X                    |                      |                      |                      |                      |
| Yuan 1998                       | X                    | X                    | X                    |                      |                      |
| Parker 2002                     | X                    | X                    | X                    |                      |                      |
| Mattioli 2002                   | X                    | X                    | X                    |                      |                      |
| Greving 2007                    | X                    | X                    | X                    |                      |                      |
| Hsu 2007                        | X                    | X                    | X                    |                      |                      |
| Hu 2008                         | X                    |                      | X                    |                      |                      |
| Pelucchi 2008                   | X                    | X                    | X                    |                      |                      |
| Benedetti 2009                  | X                    | X                    | X                    |                      |                      |
| Setiawan 2007                   | X                    |                      | X                    | X                    | X                    |
| Lee 2007                        | X                    |                      | X                    | X                    |                      |
| Ozasa 2007                      | X                    |                      |                      | X                    |                      |
| Allen 2009                      | X                    |                      |                      | X                    |                      |
| Kim 2010                        | X                    |                      |                      | X                    |                      |
| Maclure 1990                    |                      | X                    | X                    |                      |                      |
| Brock 2009                      |                      | X                    |                      |                      |                      |

|                                                     |               |           |           |          |          |
|-----------------------------------------------------|---------------|-----------|-----------|----------|----------|
| Fu 2008 2009                                        |               | X         |           |          |          |
| Wynder 1974                                         |               |           | X         |          |          |
| Mclaughlin 1984                                     |               |           | X         |          |          |
| Asal 1988                                           |               |           | X         |          |          |
| Hiatt 1994                                          |               |           | X         |          |          |
| Muscat 1995                                         |               |           | X         |          |          |
| Boeing 1997                                         |               |           | X         |          |          |
| Allen 2011                                          |               |           | X         |          | X        |
| Lew 2011                                            |               |           | X         | X        | X        |
| Karamini 2014                                       |               |           |           | X        |          |
| Macleod 2013                                        |               |           |           | X        |          |
| Wilson 2009                                         |               |           |           |          | X        |
| Schouten 2008                                       |               |           |           |          | X        |
| Rashidkhani 2005                                    |               |           |           |          | X        |
| Nicodemus 2004                                      |               |           |           |          | X        |
| <b>Total (No of publications per meta-analysis)</b> | <b>20</b>     | <b>15</b> | <b>24</b> | <b>8</b> | <b>7</b> |
| <b>Grand Total (N)</b>                              | <b>74</b>     |           |           |          |          |
| <b>Rows (r)</b>                                     | <b>37</b>     |           |           |          |          |
| <b>Columns (c)</b>                                  | <b>5</b>      |           |           |          |          |
| <b>Corrected covered area (CCA)</b>                 | <b>25.00%</b> |           |           |          |          |

Formula for calculating the corrected covered area,  $CCA (\%) = N-r / rc-r$

Where N = number of included publications (sum of checked boxes), r = number of rows (Individual publications), c = number of columns (number of meta-analyses)



## G. Dietary fiber

| <b>Meta-analysis</b>                                | Huang 2014           | Xu 2019              |
|-----------------------------------------------------|----------------------|----------------------|
| <b>Overlapping associations</b>                     | Renal cell carcinoma | Renal cell carcinoma |
| <b>Individual study</b>                             |                      |                      |
| Daniel 2013                                         | X                    | X                    |
| Wolk 1996                                           | X                    | X                    |
| Lindblad 1997                                       | X                    |                      |
| Allen 2009                                          | X                    | X                    |
| Hu 2008                                             | X                    | X                    |
| Galeone 2007                                        | X                    | X                    |
| Brock 2012                                          |                      | X                    |
| Zhu 2017                                            |                      | X                    |
| <b>Total (No of publications per meta-analysis)</b> | <b>6</b>             | <b>7</b>             |
| <b>Grand Total (N)</b>                              | <b>13</b>            |                      |
| <b>Rows (r)</b>                                     | <b>8</b>             |                      |
| <b>Columns (c)</b>                                  | <b>2</b>             |                      |
| <b>Corrected covered area (CCA)</b>                 | <b>62.50%</b>        |                      |

Formula for calculating the corrected covered area,  $CCA (\%) = N - r / rc - r$

Where N = number of included publications (sum of checked boxes), r = number of rows (Individual publications), c = number of columns (number of meta-analyses)

## H. Coffee

| <b>Meta-analysis</b>                                | Huang 2014           | Wijarnpreecha 2017   |
|-----------------------------------------------------|----------------------|----------------------|
| <b>Overlapping associations</b>                     | Renal cell carcinoma | Renal cell carcinoma |
| <b>Individual study</b>                             |                      |                      |
| Jacobsen 1986                                       | X                    |                      |
| Stensvold 1994                                      | X                    |                      |
| Washio 2005                                         | X                    | X                    |
| Lee 2006                                            | X                    | X                    |
| Armstrong 1976                                      |                      | X                    |
| Asal 1988                                           |                      | X                    |
| Benhamou 1993                                       |                      | X                    |
| Bravi 2007                                          |                      | X                    |
| Goodman 1986                                        |                      | X                    |
| Hu 2009                                             |                      | X                    |
| Kreiger 1993                                        |                      | X                    |
| Maclure 1990                                        |                      | X                    |
| McLaughlin 1984                                     |                      | X                    |
| Mellemgaard 1994                                    |                      | X                    |
| Montella 2009                                       |                      | X                    |
| Mucci 2004                                          |                      | X                    |
| Talamini 1990                                       |                      | X                    |
| Wolk 1996                                           |                      | X                    |
| Yu 1986                                             |                      | X                    |
| Yuan 1998                                           |                      | X                    |
| Allen 2011                                          |                      | X                    |
| Hashibe 2015                                        |                      | X                    |
| Lee 2007                                            |                      | X                    |
| Nilsson 2010                                        |                      | X                    |
| <b>Total (No of publications per meta-analysis)</b> | <b>4</b>             | <b>22</b>            |
| <b>Grand Total (N)</b>                              | <b>26</b>            |                      |
| <b>Rows (r)</b>                                     | <b>24</b>            |                      |
| <b>Columns (c)</b>                                  | <b>2</b>             |                      |
| <b>Corrected covered area (CCA)</b>                 | <b>8.30%</b>         |                      |

Formula for calculating the corrected covered area,  $CCA (\%) = N - r / rc - r$

Where N = number of included publications (sum of checked boxes), r = number of rows (Individual publications), c = number of columns (number of meta-analyses)

**Table S4: List of excluded studies and reasons for their exclusion**

|    | <b>Ist Author</b> | <b>Year</b> | <b>Title</b>                                                                                                           | <b>Reason for Exclusion</b>             |
|----|-------------------|-------------|------------------------------------------------------------------------------------------------------------------------|-----------------------------------------|
| 1  | Adams VR          | 2007        | Sunitinib malate for the treatment of metastatic renal cell carcinoma and gastrointestinal stromal tumors              | not related to the topic                |
| 2  | Arab L            | 2010        | Epidemiologic Evidence on Coffee and Cancer                                                                            | no meta-analysis                        |
| 3  | Bara T            | 2017        | A systematic review of the possible carcinogenic role of the aristolochic acid                                         | not related to the topic                |
| 4  | Biggar PH         | 2011        | Vitamin D, chronic kidney disease and survival: a pluripotent hormone or just another bone drug?                       | not related to the topic                |
| 5  | Caprio GG         | 2020        | Light Alcohol Drinking and the Risk of Cancer Development: A Controversial Relationship                                | no meta-analysis                        |
| 6  | Chaudhari PB      | 2017        | Nivolumab - Pearls of Evidence                                                                                         | not related to the topic                |
| 7  | Fang J            | 2020        | Lower circulating adiponectin is associated with higher risk of renal cell carcinoma: A meta-analysis                  | not related to the topic                |
| 8  | Fox CH            | 2002        | Phytic acid (IP6), novel broad spectrum anti-neoplastic agent: a systematic review                                     | not related to the topic                |
| 9  | Gandini S         | 2014        | Vitamin D receptor polymorphisms and cancer                                                                            | not related to the topic                |
| 10 | Gnagnarella P     | 2020        | Vitamin D Receptor Polymorphisms and Cancer                                                                            | not related to the topic                |
| 11 | Gouveia MC        | 2016        | Association between irisin and major chronic diseases: a review                                                        | exposure of plasma levels or biomarkers |
| 12 | Graff RE          | 2018        | Dietary Acrylamide Intake and Risk of Renal Cell Carcinoma in Two Large Prospective Cohorts                            | individual studies                      |
| 13 | Händel MN         | 2019        | Processed meat intake and chronic disease morbidity and mortality: An overview of systematic reviews and meta-analyses | no meta-analysis                        |
| 14 | Il'yasova D       | 2005        | Cadmium and renal cancer                                                                                               | not related to the topic                |
| 15 | Jeyaraman MM      | 2019        | Dairy product consumption and development of cancer: An overview of reviews                                            | no meta-analysis                        |
| 16 | Kabaria R         | 2016        | Renal cell carcinoma: links and risks                                                                                  | no meta-analysis                        |
| 17 | Kamat AM          | 1999        | Chemoprevention of urological cancer                                                                                   | no meta-analysis                        |
| 18 | Key T             | 2004        | Diet, nutrition and the prevention of cancer                                                                           | no meta-analysis                        |

|    |                 |      |                                                                                                                                                               |                          |
|----|-----------------|------|---------------------------------------------------------------------------------------------------------------------------------------------------------------|--------------------------|
| 19 | Khan MI         | 2014 | Vitamin D receptor gene polymorphisms in breast and renal cancer: Current state and future approaches                                                         | not related to the topic |
| 20 | Krajewski W     | 2016 | Vitamin D and urological cancers                                                                                                                              | no meta-analysis         |
| 21 | Kume H          | 2001 | Risk factors for adult renal cell carcinoma: a systematic review and implications for prevention                                                              | comment                  |
| 22 | Latino-Martel P | 2016 | Alcoholic beverages, obesity, physical activity and other nutritional factors, and cancer risk: A review of the evidence                                      | no meta-analysis         |
| 23 | Lenko V         | 2013 | The relationship between renal cell carcinoma and nuclear retinoid/rexinoid receptors                                                                         | not related to the topic |
| 24 | Ljungberg B     | 2011 | The Epidemiology of Renal Cell Carcinoma                                                                                                                      | no meta-analysis         |
| 25 | Luong KVQ       | 2010 | The beneficial role of vitamin D and its analogs in cancer treatment and prevention                                                                           | no meta-analysis         |
| 26 | Miller PE       | 2012 | Phytochemicals and Cancer Risk: A Review of the Epidemiological Evidence                                                                                      | no meta-analysis         |
| 27 | Niu XH          | 2021 | Prognostic significance of pretreatment controlling nutritional status score in urological cancers: a systematic review and meta-analysis                     | not related to the topic |
| 28 | Ouzzane A       | 2014 | Epidemiology and risk factors of upper urinary tract tumors: Literature review for the yearly scientific report of the French National Association of Urology | not published in English |
| 29 | Riboldi BP      | 2014 | Risks of dietary acrylamide exposure: A systematic review                                                                                                     | no meta-analysis         |
| 30 | Rumrich IK      | 2016 | Maternal Smoking and the Risk of Cancer in Early Life - A Meta-Analysis                                                                                       | not related to the topic |
| 31 | Stelmach RD     | 2015 | Household Water Quantity and Health: A Systematic Review                                                                                                      | no meta-analysis         |
| 32 | Strohle A       | 2006 | Vegetarian nutrition: Preventive potential and possible risks Part 1: Plant foods                                                                             | not related to the topic |
| 33 | Teissedre PL    | 2020 | Effects of alcohol consumption in general, and wine in particular, on the risk of cancer development: a review                                                | no meta-analysis         |
| 34 | Virk-Baker MK   | 2014 | Dietary Acrylamide and Human Cancer: A Systematic Review of Literature                                                                                        | no meta-analysis         |
| 35 | Weikert S       | 2010 | Contemporary epidemiology of renal cell carcinoma: perspectives of primary prevention                                                                         | no meta-analysis         |

|    |             |      |                                                                                                                                                                 |                                         |
|----|-------------|------|-----------------------------------------------------------------------------------------------------------------------------------------------------------------|-----------------------------------------|
| 36 | Wu F        | 2013 | Risk Assessment of Upper Tract Urothelial Carcinoma Related to Aristolochic Acid                                                                                | not related to the topic                |
| 37 | Al-Bayati O | 2019 | Systematic review of modifiable risk factors for kidney cancer<br>WCRF-AICR continuous update project:                                                          | no meta-analysis                        |
| 38 | Darling AL  | 2016 | Systematic literature review of prospective studies on circulating 25-hydroxyvitamin D and kidney cancer risk                                                   | exposure of plasma levels or biomarkers |
| 39 | Dhote R     | 2004 | Risk factors for adult renal cell carcinoma                                                                                                                     | no meta-analysis                        |
| 40 | Dhôte R     | 2000 | Risk factors for adult renal cell carcinoma: a systematic review and implications for prevention                                                                | no meta-analysis                        |
| 41 | Javed F     | 2010 | Systemic conditions associated with areca nut usage: A literature review                                                                                        | not related to the topic                |
| 42 | Jiang F     | 2020 | No association between dietary acrylamide and renal cell carcinoma: an updated meta-analysis                                                                    | not related to the topic                |
| 43 | Johnson C   | 2015 | The Science of Salt: A Systematic Review of Clinical Salt Studies 2013 to 2014                                                                                  | no meta-analysis                        |
| 44 | Kim JY      | 2009 | Garlic intake and cancer risk: an analysis using the Food and Drug Administration's evidence-based review system for the scientific evaluation of health claims | no meta-analysis                        |
| 45 | Lin GZ      | 2015 | Examining the association of circulating 25-hydroxyvitamin D with kidney cancer risk: a meta-analysis                                                           | exposure of plasma levels or biomarkers |
| 46 | Lipworth L  | 2006 | The epidemiology of renal cell carcinoma                                                                                                                        | no meta-analysis                        |
| 47 | Mao BJ      | 2015 | One-Carbon Metabolic Factors and Risk of Renal Cell Cancer: A Meta-Analysis                                                                                     | exposure of plasma levels or biomarkers |
| 48 | Pelucchi C  | 2015 | Dietary acrylamide and cancer risk: An updated meta-analysis                                                                                                    | not related to the topic                |
| 49 | Pelucchi C  | 2011 | Exposure to acrylamide and human cancer-a review and meta-analysis of epidemiologic studies                                                                     | not related to the topic                |
| 50 | Rosato V    | 2018 | Processed Meat and Risk of Renal Cell and Bladder Cancers                                                                                                       | no meta-analysis                        |
| 51 | Yip CSC     | 2019 | The Associations of Fruit and Vegetable Intakes with Burden of Diseases: A Systematic Review of Meta-Analyses                                                   | no meta-analysis                        |
| 52 | Yu XF       | 2011 | Coffee consumption and risk of cancers: a meta-analysis of cohort studies                                                                                       | not related to the topic                |
| 53 | Navai N     | 2012 | Environmental and modifiable risk factors in renal cell carcinoma                                                                                               | no meta-analysis                        |

|    |              |      |                                                                                                                                                                       |                                         |
|----|--------------|------|-----------------------------------------------------------------------------------------------------------------------------------------------------------------------|-----------------------------------------|
| 54 | Washio M     | 2011 | Risk Factors for Kidney Cancer (Renal Cell Carcinoma) in a Japanese Population: A Mini-Review                                                                         | no meta-analysis                        |
| 55 | Boeing H     | 1997 | Diet, obesity and risk for renal cell carcinoma: results from a case control-study in Germany                                                                         | individual studies                      |
| 56 | Gallicchio L | 2010 | Circulating 25-hydroxyvitamin D and risk of kidney cancer: Cohort Consortium Vitamin D Pooling Project of Rarer Cancers Kidney Cancer Protocol Version 1.             | exposure of plasma levels or biomarkers |
| 57 | WCRF         | -    | Continuous update of the epidemiological evidence on food, nutrition, physical activity and the risk of kidney cancer                                                 | protocol                                |
| 58 | WCRF         | 2018 | World Cancer Research Fund/American Institute for Cancer Research. Continuous Update Project Expert Report 2018. Diet, nutrition, physical activity and kidney cancer | reviews with overlapping associations   |
| 59 | Alexander DD | 2009 | Quantitative assessment of red meat or processed meat consumption and kidney cancer                                                                                   | reviews with overlapping associations   |
| 60 | Bellocco R   | 2012 | Alcohol drinking and risk of renal cell carcinoma: results of a meta-analysis                                                                                         | reviews with overlapping associations   |
| 61 | Huang TB     | 2014 | Coffee consumption and urologic cancer risk: a meta-analysis of cohort studies                                                                                        | reviews with overlapping associations   |
| 62 | Liu B        | 2013 | Cruciferous Vegetables Consumption and Risk of Renal Cell Carcinoma: A Meta-Analysis                                                                                  | reviews with overlapping associations   |
| 63 | Shang YG     | 2015 | Vitamin E Intake and Risk of Renal Cell Carcinoma: A Meta-Analysis of 7 Case-Control Studies                                                                          | reviews with overlapping associations   |
| 64 | Song DY      | 2012 | Alcohol intake and renal cell cancer risk: a meta-analysis                                                                                                            | reviews with overlapping associations   |

**Table S5: AMSTAR 2 quality appraisal scores**

| Item No        | 1   | 2✖ | 3   | 4✖          | 5   | 6   | 7✖ | 8   | 9✖  | 10 | 11✖ | 12  | 13✖ | 14  | 15✖ | 16  | Overall Rating |
|----------------|-----|----|-----|-------------|-----|-----|----|-----|-----|----|-----|-----|-----|-----|-----|-----|----------------|
| Alexander 2009 | Yes | No | No  | No          | No  | No  | No | Yes | No  | No | Yes | Yes | Yes | Yes | Yes | Yes | critically low |
| Alizadeh 2017  | Yes | No | No  | Partial Yes | No  | Yes | No | Yes | Yes | No | Yes | Yes | Yes | Yes | Yes | Yes | moderate       |
| Bai 2013       | Yes | No | No  | Partial Yes | Yes | Yes | No | Yes | Yes | No | Yes | Yes | Yes | Yes | Yes | Yes | low            |
| Bellocco 2012  | Yes | No | No  | Partial Yes | Yes | No  | No | Yes | Yes | No | Yes | Yes | Yes | Yes | No  | Yes | moderate       |
| Boyle 2014     | Yes | No | Yes | Partial Yes | No  | Yes | No | No  | No  | No | No  | No  | No  | No  | No  | Yes | critically low |
| Cheng 2011     | Yes | No | No  | No          | No  | No  | No | Yes | No  | No | Yes | Yes | Yes | Yes | Yes | No  | critically low |
| Clasen 2020    | Yes | No | No  | Partial Yes | Yes | Yes | No | Yes | Yes | No | No  | Yes | Yes | No  | Yes | Yes | low            |
| Faramawi 2007  | Yes | No | No  | Partial Yes | Yes | Yes | No | Yes | No  | No | Yes | Yes | Yes | Yes | No  | No  | low            |
| Hu 2013        | Yes | No | No  | Partial Yes | Yes | Yes | No | Yes | No  | No | Yes | Yes | Yes | No  | Yes | No  | low            |
| Huang 2014     | Yes | No | No  | Partial Yes | Yes | Yes | No | Yes | Yes | No | Yes | Yes | Yes | Yes | Yes | Yes | moderate       |
| Huang 2014     | Yes | No | No  | Partial     | Yes | Yes | No | Yes | No  | No | Yes | No  | Yes | Yes | No  | Yes | low            |

|                    |     |    |    |                |     |     |    |     |     |    |     |     |     |     |     |     |                   |
|--------------------|-----|----|----|----------------|-----|-----|----|-----|-----|----|-----|-----|-----|-----|-----|-----|-------------------|
|                    |     |    |    | Yes            |     |     |    |     |     |    |     |     |     |     |     |     |                   |
| Jayedi 2018        | Yes | No | No | Partial<br>Yes | Yes | Yes | No | Yes | Yes | No | Yes | Yes | Yes | Yes | No  | Yes | moderate          |
| Jia 2015           | Yes | No | No | Partial<br>Yes | Yes | Yes | No | Yes | No  | No | Yes | Yes | Yes | Yes | Yes | Yes | low               |
| Lee 2008           | Yes | No | No | No             | No  | No  | No | Yes | No  | No | No  | No  | No  | Yes | No  | Yes | critically<br>low |
| Liu 2013           | Yes | No | No | Partial<br>Yes | Yes | No  | No | Yes | No  | No | Yes | No  | Yes | No  | Yes | No  | low               |
| Llaha 2021         | Yes | No | No | Partial<br>Yes | Yes | Yes | No | Yes | Yes | No | Yes | Yes | Yes | Yes | No  | Yes | moderate          |
| Shang 2015         | Yes | No | No | No             | Yes | No  | No | Yes | Yes | No | Yes | Yes | Yes | Yes | No  | Yes | low               |
| Shen 2015          | Yes | No | No | Partial<br>Yes | Yes | Yes | No | Yes | No  | No | No  | Yes | Yes | Yes | Yes | Yes | critically<br>low |
| Song 2012          | Yes | No | No | Partial<br>Yes | Yes | Yes | No | Yes | Yes | No | Yes | No  | No  | Yes | No  | No  | low               |
| Wijarnpreecha 2017 | Yes | No | No | Partial<br>Yes | Yes | Yes | No | Yes | Yes | No | Yes | Yes | Yes | Yes | No  | Yes | moderate          |
| Wu 2020            | Yes | No | No | Partial<br>Yes | Yes | Yes | No | Yes | Yes | No | Yes | Yes | Yes | Yes | Yes | Yes | moderate          |
| Xie 2016           | Yes | No | No | No             | Yes | Yes | No | Yes | No  | No | No  | Yes | Yes | Yes | No  | Yes | critically<br>low |
| Xu 2019            | Yes | No | No | Partial<br>Yes | Yes | Yes | No | Yes | Yes | No | No  | No  | No  | Yes | No  | Yes | critically<br>low |



|            |     |     |     |                |     |     |     |     |     |    |     |     |     |     |     |     |                   |
|------------|-----|-----|-----|----------------|-----|-----|-----|-----|-----|----|-----|-----|-----|-----|-----|-----|-------------------|
| Xu 2015    | Yes | No  | No  | Partial<br>Yes | Yes | Yes | No  | Yes | Yes | No | Yes | Yes | Yes | Yes | No  | Yes | moderate          |
| Zhang 2017 | Yes | No  | No  | Partial<br>Yes | Yes | Yes | No  | Yes | Yes | No | No  | Yes | Yes | Yes | Yes | Yes | critically<br>low |
| Zhang 2017 | Yes | No  | No  | Partial<br>Yes | Yes | Yes | No  | Yes | Yes | No | Yes | Yes | Yes | Yes | Yes | Yes | moderate          |
| Zhao 2013  | Yes | No  | No  | Partial<br>Yes | Yes | Yes | No  | Yes | Yes | No | Yes | Yes | Yes | Yes | Yes | Yes | moderate          |
| WCRF 2013  | Yes | Yes | Yes | Partial<br>Yes | Yes | Yes | Yes | Yes | No  | No | Yes | Yes | Yes | Yes | Yes | No  | low               |
| WCRF 2018  | Yes | Yes | Yes | Partial<br>Yes | Yes | Yes | Yes | Yes | No  | No | Yes | Yes | Yes | Yes | Yes | No  | low               |

※: critical domains. Item 1: inclusion of PICO elements? Item 2: review methods established before conduct of review? Item 3: explanation for selection of study designs to be included in review? Item 4: use of a comprehensive search strategy? Item 5: selection of studies in duplicate? Item 6: data extraction in duplicate? Item 7: provision of list of excluded studies with justification for exclusion? Item 8: description of included studies in adequate detail? Item 9: satisfactory technique for risk of bias? Item 10: sources of funding for included studies reported? Item 11: proper methods for meta-analysis? Item 12: potential risk of bias in included studies discussed? Item 13: risk of bias accounted for in interpreting results? Item 14: heterogeneity discussed? Item 15: if meta-analysis conducted was publication bias discussed? Item 16: disclosure of funding or conflict of interest?

**Table S6: General characteristics of meta-analyses with overlapping associations**

| Exposure               | 1st author    | Year | No of primary studies | AMSTAR 2 rating | Corrected covered area (CCA) | Decision to retain<br>✓ = Yes<br>✗ = No |
|------------------------|---------------|------|-----------------------|-----------------|------------------------------|-----------------------------------------|
| Red meat               | Alexander     | 2009 | 11                    | critically low  | 15.20%                       | ✗                                       |
|                        | Faramawi      | 2007 | 6                     | low             |                              | ✗                                       |
|                        | Lee           | 2008 | 13                    | critically low  |                              | ✗                                       |
|                        | Zhang         | 2017 | 19                    | moderate        |                              | ✓                                       |
| Processed meat         | Alexander     | 2009 | 10                    | critically low  | 15.60%                       | ✗                                       |
|                        | Faramawi      | 2007 | 4                     | low             |                              | ✗                                       |
|                        | Lee           | 2008 | 13                    | critically low  |                              | ✗                                       |
|                        | Zhang         | 2017 | 19                    | moderate        |                              | ✓                                       |
| Alcohol                | Bellocco      | 2012 | 20                    | moderate        | 25.00%                       | ✗                                       |
|                        | Cheng         | 2011 | 15                    | critically low  |                              | ✗                                       |
|                        | Song          | 2012 | 24                    | low             |                              | ✗                                       |
|                        | Xu            | 2015 | 8                     | moderate        |                              | ✓                                       |
|                        | WCRF          | 2018 | 7                     | low             |                              | ✗                                       |
| Poultry*               | Faramawi      | 2007 | 4                     | low             | 0                            | ✓                                       |
|                        | Lee           | 2008 | 12                    | critically low  |                              | ✓                                       |
| Dietary fiber          | Huang         | 2014 | 6                     | moderate        | 62.50%                       | ✗                                       |
|                        | Xu            | 2019 | 7                     | critically low  |                              | ✓                                       |
| Cruciferous Vegetables | Liu           | 2013 | 10                    | low             | 46.70%                       | ✗                                       |
|                        | Zhao          | 2013 | 12                    | moderate        |                              | ✓                                       |
| Vitamin E              | Shang         | 2015 | 7                     | low             | 42.90%                       | ✗                                       |
|                        | Shen          | 2015 | 13                    | critically low  |                              | ✓                                       |
| Coffee                 | Huang         | 2014 | 4                     | low             | 8.30%                        | ✗                                       |
|                        | Wijarnpreecha | 2017 | 22                    | moderate        |                              | ✓                                       |

\*: Both articles were retained because the overlapping was 0.

**Table S7:****A. List of studies included in analysis**

|    | <b>Name of the first author</b> | <b>Publication year</b> | <b>Title</b>                                                                                                                                       |
|----|---------------------------------|-------------------------|----------------------------------------------------------------------------------------------------------------------------------------------------|
| 1  | Shahab Alizadeh                 | 2017                    | A posteriori dietary patterns and risk of pancreatic and renal cancers: a systematic review and meta-analysis                                      |
| 2  | Hong-wei Bai                    | 2013                    | The Association between Fish Consumption and Risk of Renal Cancer: A Meta-Analysis of Observational Studies                                        |
| 3  | Peter Boyle                     | 2014                    | Sweetened carbonated beverage consumption and cancer risk: meta-analysis and review                                                                |
| 4  | Guang Cheng                     | 2011                    | Alcohol intake and risk of renal cell carcinoma: a meta-analysis of published case-control studies                                                 |
| 5  | Joanna L. Clasen                | 2020                    | Components of one-carbon metabolism and renal cell carcinoma: a systematic review and meta-analysis                                                |
| 6  | Mohammed F. Faramawi            | 2007                    | Consumption of different types of meat and the risk of renal cancer: meta-analysis of case-control studies                                         |
| 7  | Zheng-Hui Hu                    | 2013                    | No Association Between Tea Consumption and Risk of Renal Cell Carcinoma: A Meta-analysis of Epidemiological Studies                                |
| 8  | Tian-bao Huang                  | 2014                    | Dietary fiber intake and risk of renal cell carcinoma: evidence from a meta-analysis                                                               |
| 9  | Ahmad Jayedi                    | 2018                    | Dietary Inflammatory Index and Site-Specific Cancer Risk: A Systematic Review and Dose-Response Meta-Analysis                                      |
| 10 | Li Jia                          | 2015                    | Vitamin C intake and risk of renal cell carcinoma: a meta-analysis                                                                                 |
| 11 | Jung Eun Lee                    | 2008                    | Fat, Protein, and Meat Consumption and Renal Cell Cancer Risk: A Pooled Analysis of 13 Prospective Studies                                         |
| 12 | Fjorida Llaha                   | 2021                    | Consumption of Sweet Beverages and Cancer Risk. A Systematic Review and Meta-Analysis of Observational Studies                                     |
| 13 | Chongxing Shen                  | 2015                    | Association of Vitamin E Intake with Reduced Risk of Kidney Cancer: A Meta-Analysis of Observational Studies                                       |
| 14 | Karn Wijarnpreecha              | 2017                    | Association between coffee consumption and risk of renal cell carcinoma: a meta-analysis                                                           |
| 15 | Jing Wu                         | 2020                    | Dietary and circulating vitamin D and risk of renal cell carcinoma: a meta-analysis of observational studies                                       |
| 16 | Li Xie                          | 2016                    | Association between dietary nitrate and nitrite intake and site-specific cancer risk: evidence from observational studies                          |
| 17 | Xin Xu                          | 2019                    | Dietary fiber, glycemic index, glycemic load, and renal cell carcinoma risk                                                                        |
| 18 | Xin Xu                          | 2015                    | Does beer, wine or liquor consumption correlate with the risk of renal cell carcinoma? A dose-response meta analysis of prospective cohort studies |
| 19 | Shaojin Zhang                   | 2017                    | Consumption of fruits and vegetables and risk of renal cell carcinoma: a meta-analysis of observational studies                                    |
| 20 | Shaojing Zhang                  | 2017                    | Intake of red and processed meat and risk of renal cell carcinoma: a meta-analysis of observational studies                                        |

|    |          |      |                                                                                                                                             |
|----|----------|------|---------------------------------------------------------------------------------------------------------------------------------------------|
| 21 | Jun Zhao | 2013 | Cruciferous Vegetables Intake Is Associated with Lower Risk of Renal Cell Carcinoma: Evidence from a Meta-Analysis of Observational Studies |
| 22 | WCRF     | 2013 | The Associations between Diet, Nutrition and Physical Activity and the Risk of Kidney Cancer                                                |

**B. List of meta-analyses with overlapping associations excluded from analysis**

|   |                         |      |                                                                                                    |
|---|-------------------------|------|----------------------------------------------------------------------------------------------------|
| 1 | Dominik D.<br>Alexander | 2009 | Quantitative assessment of red meat or processed meat consumption and kidney cancer                |
| 2 | R. Bellocco             | 2012 | Alcohol drinking and risk of renal cell carcinoma: results of a meta-analysis                      |
| 3 | Tian-bao Huang          | 2014 | Coffee consumption and urologic cancer risk: a meta-analysis of cohort studies                     |
| 4 | Ben Liu                 | 2013 | Cruciferous Vegetables Consumption and Risk of Renal Cell Carcinoma: A Meta-Analysis               |
| 5 | Yonggang Shang          | 2015 | Vitamin E Intake and Risk of Renal Cell Carcinoma: A Meta-Analysis of 7 Case-Control Studies       |
| 6 | DY Song                 | 2012 | Alcohol intake and renal cell cancer risk: a meta-analysis                                         |
| 7 | WCRF                    | 2018 | Continuous Update Project Expert Report 2018. Diet, nutrition, physical activity and kidney cancer |

**Table S8: Characteristics of the conducted meta-analyses and results of the recalculation, the methodological assessment (AMSTAR 2) and the level of evidence by exposure**

| Exposure                                        | Reference     | No of primary studies | Comparison        | Rang/amount                        | No. of participants / No. of cases | Adjusted SHR (95%-CI) | p-value  | I <sup>2</sup> | τ <sup>2</sup> | 95%-PI       | Egger's p-value | AMSTAR2        | Level of evidence |
|-------------------------------------------------|---------------|-----------------------|-------------------|------------------------------------|------------------------------------|-----------------------|----------|----------------|----------------|--------------|-----------------|----------------|-------------------|
| <b>Dietary patterns or diet quality indices</b> |               |                       |                   |                                    |                                    |                       |          |                |                |              |                 |                |                   |
| Healthy dietary pattern                         | Alizadeh 2017 | 4                     | High v low intake | higher adherence v lower adherence | 51709/1327                         | 0.66 (0.51 to 0.85)   | 0.00145  | 19.40%         | 0.0269         | 0.27 to 1.63 | 0.1278748       | moderate       | IV                |
| Unhealthy/western pattern                       | Alizadeh 2017 | 4                     | High v low intake | higher adherence v lower adherence | 51709/1327                         | 1.54 (1.19 to 2.01)   | 0.001232 | 24.70%         | 0.027          | 0.62 to 3.84 | 0.4200446       | moderate       | IV                |
| Drinking pattern                                | Alizadeh 2017 | 2                     | High v low intake | higher adherence v lower adherence | 47705/554                          | 0.69 (0.47 to 1.01)   | 0.057101 | 0.00%          | 0.0002         | NA           | NA              | moderate       | NS                |
| Dietary Inflammatory Index                      | Jayedi 2018   | 2                     | dose-response     | 1-unit increment                   | 36118/1030                         | 1.08 (1.03 to 1.13)   | 0.00276  | 0.00%          | < 0.0001       | NA           | NA              | moderate       | IV                |
| Glycemic index                                  | Xu 2019       | 5                     | High v low intake | higher adherence v lower adherence | 502119/4281                        | 1.18 (1.02 to 1.37)   | 0.026826 | 26.00%         | 0.0099         | 0.79 to 1.75 | 0.3402257       | critically low | IV                |
| Glycemic load                                   | Xu 2019       | 5                     | High v low intake | higher adherence v lower adherence | 502119/4281                        | 1.16 (0.73 to 1.84)   | 0.522525 | 82.40%         | 0.2346         | 0.21 to 6.45 | 0.8561544       | critically low | NS                |
| <b>Foods</b>                                    |               |                       |                   |                                    |                                    |                       |          |                |                |              |                 |                |                   |
| Fish                                            | Bai 2013      | 15                    | High v low intake | higher adherence v lower adherence | 608753/9324                        | 0.97 (0.84 to 1.10)   | 0.612245 | 24.10%         | 0.0335         | 0.63 to 1.47 | 0.2963335       | low            | NS                |
| All meat                                        | Faramawi 2007 | 11                    | High v low intake | higher adherence v lower adherence | 15237/4835                         | 1.27 (1.08 to 1.49)   | 0.003529 | 0.00%          | 0.0288         | 0.83 to 1.94 | 0.5296527       | low            | IV                |
| Seafood*                                        | Lee 2008      | 12                    | High v low intake | higher adherence v lower adherence | NA/1375                            | 1.05 (0.82 to 1.35)   | NA       | NA             | NA             | NA           | NA              | critically low | -                 |
| Vegetables                                      | Zhang 2017    | 16                    | High v low intake | higher adherence v lower adherence | 1365634/9353                       | 0.74 (0.63 to 0.86)   | 0.000073 | 51.30%         | 0.0507         | 0.44 to 1.23 | 0.04925753      | critically low | III               |

|                                             |                            |    |                   |                                       |               |                     |          |        |        |                      |             |                        |     |
|---------------------------------------------|----------------------------|----|-------------------|---------------------------------------|---------------|---------------------|----------|--------|--------|----------------------|-------------|------------------------|-----|
| Fruits                                      | Zhang 2017                 | 17 | High v low intake | higher adherence v<br>lower adherence | 1398778/9150  | 0.84 (0.69 to 1.02) | 0.075352 | 50.90% | 0.1158 | 0.39 to 1.78         | 0.1237748   | critically low         | NS  |
| Red meat†                                   | Zhang 2017                 | 19 | High v low intake | higher adherence v<br>lower adherence | 1826171/12631 | 1.40 (1.15 to 1.70) | 0.000807 | 71.40% | 0.1353 | 0.63 to 3.13         | 0.003128808 | moderate               | III |
| Processed meat                              | Zhang 2017                 | 19 | High v low intake | higher adherence v<br>lower adherence | 1793675/14240 | 1.13 (1.01 to 1.26) | 0.030876 | 46.80% | 0.0282 | 0.78 to 1.64         | 0.8249137   | moderate               | IV  |
| Poultry#                                    | Faramawi 2007;<br>Lee 2008 | 16 | High v low intake | higher adherence v<br>lower adherence | NA/4165       | 1.23 (1.02 to 1.47) | 0.030824 | 0.00%  | 0.005  | 0.88 to 1.70         | 0.2519625   | low;<br>critically low | IV  |
| Cruciferous<br>vegetables                   | Zhao 2013                  | 12 | High v low intake | higher adherence v<br>lower adherence | 1228518/5773  | 0.81 (0.71 to 0.92) | 0.001107 | 55.70% | 0.0271 | 0.54 to 1.20         | 0.3483077   | moderate               | IV  |
| Fruit and non-<br>starchy vegetables        | WCRF 2013                  | 7  | Dose-response     | per 100 g/d                           | 756544/1215   | 0.99 (0.93 to 1.05) | 0.748236 | 0.00%  | 0.0021 | 0.85 to 1.15         | 0.07948871  | low                    | NS  |
| Non-starchy<br>vegetables                   | WCRF 2013                  | 8  | Dose-response     | per 100 g/d                           | 1248385/3031  | 0.99 (0.91 to 1.09) | 0.942029 | 0.00%  | 0.0051 | 0.80 to 1.24         | 0.7777938   | low                    | NS  |
| Tomatoes                                    | WCRF 2013                  | 3  | Dose-response     | per 50 g/d                            | NA/427        | 1.11 (0.92 to 1.35) | 0.28285  | 0.00%  | 0.0024 | 0.27 to 4.51         | 0.8397414   | low                    | NS  |
| Citrus fruit                                | WCRF 2013                  | 7  | Dose-response     | per 50 g/d                            | NA/2735       | 0.98 (0.90 to 1.05) | 0.53534  | 0.00%  | 0.0034 | 0.80 to 1.19         | 0.8748599   | low                    | NS  |
| <b>Beverages</b>                            |                            |    |                   |                                       |               |                     |          |        |        |                      |             |                        |     |
| Sweetened<br>carbonated<br>beverage*        | Boyle 2014                 | 5  | High v low intake | higher adherence v<br>lower adherence | NA/NA         | 1.35 (0.86 to 2.11) | 0.187219 | 60.10% | 0.1927 | 0.28 to 6.51         | 0.5148688   | critically low         | NS  |
| Sweet beverages<br>(include ASB and<br>SSB) | Llaha 2021                 | 3  | High v low intake | higher adherence v<br>lower adherence | 143194/1589   | 1.33 (0.74 to 2.40) | 0.336717 | 85.60% | 0.2482 | 0.0008 to<br>2156.90 | 0.5013056   | moderate               | NS  |
| Tea                                         | Hu 2013                    | 12 | High v low intake | higher adherence v<br>lower adherence | 1571852/6636  | 1.05 (0.83 to 1.33) | 0.680841 | 71.50% | 0.1348 | 0.44 to 2.49         | 0.7843664   | low                    | NS  |
| Coffee                                      | Wijarnpreecha 2017         | 22 | High v low intake | higher adherence v                    | 1991863/NA    | 0.99 (0.84 to 1.18) | 0.949021 | 32.60% | 0.1006 | 0.50 to 1.98         | 0.9259041   | moderate               | NS  |

|                            |            |    |                   |                                       |              |                     |          |        |          |                         |            |                |    |
|----------------------------|------------|----|-------------------|---------------------------------------|--------------|---------------------|----------|--------|----------|-------------------------|------------|----------------|----|
|                            |            |    |                   | lower adherence                       |              |                     |          |        |          |                         |            |                |    |
| <b>Alcoholic beverages</b> |            |    |                   |                                       |              |                     |          |        |          |                         |            |                |    |
| Beer                       | Cheng 2011 | 8  | High v low intake | higher adherence v<br>lower adherence | NA/5538      | 0.84 (0.70 to 1.00) | 0.052184 | 14.80% | 0.0288   | 0.52 to 1.34            | 0.2440552  | critically low | NS |
| Wine                       | Cheng 2011 | 8  | High v low intake | higher adherence v<br>lower adherence | NA/5538      | 0.70 (0.52 to 0.94) | 0.019297 | 56.00% | 0.1077   | 0.30 to 1.70            | 0.8069916  | critically low | IV |
| Spirits                    | Cheng 2011 | 9  | High v low intake | higher adherence v<br>lower adherence | NA/6393      | 0.80 (0.64 to 0.99) | 0.048382 | 74.30% | 0.0768   | 0.39 to 1.62            | 0.503464   | critically low | IV |
| Alcohol (light)            | Xu 2015    | 6  | dose-response     | <12.5 g/d                             | 3720850/5214 | 0.91 (0.81 to 1.02) | 0.102662 | 39.60% | 0.0116   | 0.64 to 1.28            | 0.1086253  | moderate       | NS |
| Alcohol (moderate)         | Xu 2015    | 8  | dose-response     | 12.5 - 37.5 g/d                       | 4139301/5364 | 0.77 (0.58 to 1.02) | 0.069063 | 29.20% | 0.1288   | 0.30 to 1.98            | 0.7937301  | moderate       | NS |
| Alcohol (heavy)            | Xu 2015    | 3  | dose-response     | >37.5 g/d                             | 2065995/363  | 0.93 (0.27 to 3.22) | 0.9134   | 81.20% | 1.0389   | 0.0000 to<br>3904180.81 | 0.5801953  | moderate       | NS |
| Alcohol (any)              | Xu 2015    | 8  | High v low intake | higher adherence v<br>lower adherence | 4867646/5503 | 0.88 (0.63 to 1.22) | 0.439292 | 62.90% | 0.1971   | 0.27 to 2.81            | 0.8064805  | moderate       | NS |
| <b>Macronutrients</b>      |            |    |                   |                                       |              |                     |          |        |          |                         |            |                |    |
| Fruit fiber                | Huang 2014 | 3  | High v low intake | higher adherence v<br>lower adherence | 496292/2906  | 0.91 (0.74 to 1.11) | 0.346662 | 0.00%  | 0.0119   | 0.14 to 6.06            | 0.6841645  | moderate       | NS |
| Vegetable fiber            | Huang 2014 | 3  | High v low intake | higher adherence v<br>lower adherence | 496292/2906  | 0.68 (0.44 to 1.06) | 0.089923 | 76.90% | 0.1241   | 0.003 to<br>139.60      | 0.09604394 | moderate       | NS |
| Cereal fiber               | Huang 2014 | 3  | High v low intake | higher adherence v<br>lower adherence | 496292/2906  | 1.05 (0.88 to 1.26) | 0.569512 | 0.00%  | 0.0067   | 0.22 to 4.94            | 0.6435649  | moderate       | NS |
| Legume fiber*              | Lee 2008   | 1  | High v low intake | higher adherence v<br>lower adherence | 491841/1816  | 0.80 (0.69 to 0.93) | NA       | NA     | NA       | NA                      | NA         | moderate       | -  |
| Total fat                  | WCRF 2013  | 14 | Dose-response     | 5% energy                             | 1210245/1985 | 1.02 (0.98 to 1.07) | 0.360753 | 0.00%  | < 0.0001 | NA                      | NA         | low            | NS |
| Saturated fat              | WCRF 2013  | 14 | Dose-response     | 5% energy                             | 1210245/1985 | 1.05 (0.88 to 1.24) | 0.60759  | 41.30% | 0.0072   | NA                      | NA         | low            | NS |
| Monounsaturated fat        | WCRF 2013  | 14 | Dose-response     | 5% energy                             | 1210245/1985 | 0.98 (0.83 to 1.15) | 0.762472 | 0.00%  | 0.0022   | NA                      | NA         | low            | NS |

|                       |             |    |                   |                                       |              |                     |          |        |          |              |           |                |    |
|-----------------------|-------------|----|-------------------|---------------------------------------|--------------|---------------------|----------|--------|----------|--------------|-----------|----------------|----|
| Polyunsaturated fat   | WCRF 2013   | 14 | Dose-response     | 5% energy                             | 1210245/1985 | 0.90 (0.75 to 1.07) | 0.219824 | 18.90% | 0.0056   | NA           | NA        | low            | NS |
| Animal fat*           | Lee 2008    | 8  | High v low intake | higher adherence v<br>lower adherence | 417093/900   | 1.01 (0.96 to 1.07) | NA       | NA     | NA       | NA           | NA        | critically low | -  |
| Plant fat*            | Lee 2008    | 8  | High v low intake | higher adherence v<br>lower adherence | 417093/900   | 0.99 (0.93 to 1.05) | NA       | NA     | NA       | NA           | NA        | critically low | -  |
| Cholesterol*          | Lee 2008    | 13 | High v low intake | higher adherence v<br>lower adherence | 774952/1478  | 1.03 (0.94 to 1.14) | NA       | NA     | NA       | NA           | NA        | critically low | -  |
| Total protein         | WCRF 2013   | 14 | Dose-response     | 5% energy                             | 1210245/1985 | 1.08 (0.99 to 1.19) | 0.09981  | 0.00%  | 0.0003   | NA           | NA        | low            | NS |
| Animal protein        | WCRF 2013   | 14 | Dose-response     | 5% energy                             | 1210245/1985 | 1.10 (1.00 to 1.20) | 0.04936  | 0.00%  | < 0.0001 | NA           | NA        | low            | IV |
| Plant protein         | WCRF 2013   | 14 | Dose-response     | 5% energy                             | 1210245/1985 | 0.98 (0.80 to 1.22) | 0.88739  | 0.00%  | < 0.0001 | NA           | NA        | low            | NS |
| Dietary fiber         | Xu 2019     | 7  | High v low intake | higher adherence v<br>lower adherence | 942582/6590  | 0.82 (0.71 to 0.95) | 0.007181 | 27.60% | 0.0188   | 0.55 to 1.22 | 0.7645872 | critically low | IV |
| <b>Micronutrients</b> |             |    |                   |                                       |              |                     |          |        |          |              |           |                |    |
| Riboflavin            | Clasen 2020 | 3  | High v low intake | higher adherence v<br>lower adherence | 39789/1971   | 0.89 (0.70 to 1.13) | 0.343247 | 0.00%  | 0.0068   | 0.14 to 5.84 | 0.6171367 | low            | NS |
| Vitamin B6            | Clasen 2020 | 5  | High v low intake | higher adherence v<br>lower adherence | 164883/2407  | 0.85 (0.70 to 1.04) | 0.113403 | 0.00%  | 0.0055   | 0.58 to 1.27 | 0.5322223 | low            | NS |
| Folate                | Clasen 2020 | 6  | High v low intake | higher adherence v<br>lower adherence | 136319/3166  | 0.84 (0.69 to 1.03) | 0.088191 | 6.00%  | 0.02     | 0.52 to 1.36 | 0.4896115 | low            | NS |
| Vitamin B12           | Clasen 2020 | 3  | High v low intake | higher adherence v<br>lower adherence | 127390/1578  | 1.13 (0.88 to 1.46) | 0.331795 | 0.00%  | 0.0029   | 0.19 to 6.65 | 0.3081752 | low            | NS |
| Methionine            | Clasen 2020 | 2  | High v low intake | higher adherence v<br>lower adherence | 125094/436   | 1.29 (0.90 to 1.85) | 0.170519 | 0.00%  | 0.0137   | NA           | NA        | low            | NS |
| Choline               | Clasen 2020 | 2  | High v low intake | higher adherence v<br>lower adherence | 125094/436   | 0.87 (0.63 to 1.22) | 0.433326 | 0.00%  | 0.0035   | NA           | NA        | low            | NS |
| Betaine               | Clasen 2020 | 2  | High v low intake | higher adherence v                    | 125094/436   | 1.01 (0.62 to 1.65) | 0.962844 | 58.80% | 0.0715   | NA           | NA        | low            | NS |



|                                         |           |    |                   |                                       |             |                     |          |        |          |                      |            |                |     |
|-----------------------------------------|-----------|----|-------------------|---------------------------------------|-------------|---------------------|----------|--------|----------|----------------------|------------|----------------|-----|
|                                         |           |    |                   | lower adherence                       |             |                     |          |        |          |                      |            |                |     |
| Vitamin C                               | Jia 2015  | 10 | High v low intake | higher adherence v<br>lower adherence | 274864/5182 | 0.77 (0.66 to 0.90) | 0.000636 | 0.00%  | 0.0176   | 0.54 to 1.10         | 0.5218154  | low            | III |
| Vitamin D                               | Wu 2020   | 6  | High v low intake | higher adherence v<br>lower adherence | 187560/NA   | 0.89 (0.71 to 1.11) | 0.286865 | 36.50% | 0.0365   | 0.48 to 1.64         | 0.5000861  | moderate       | NS  |
| Dietary nitrate                         | Xie 2016  | 3  | High v low intake | higher adherence v<br>lower adherence | NA/NA       | 0.78 (0.40 to 1.55) | 0.482996 | 89.20% | 0.3018   | 0.0002 to<br>3013.70 | 0.7608724  | critically low | NS  |
| Dietary nitrite                         | Xie 2016  | 2  | High v low intake | higher adherence v<br>lower adherence | NA/NA       | 0.99 (0.81 to 1.21) | 0.892113 | 0.00%  | 0.0061   | NA                   | NA         | critically low | NS  |
| Vitamin E                               | Shen 2015 | 13 | High v low intake | higher adherence v<br>lower adherence | 471006/6944 | 0.81 (0.69 to 0.94) | 0.006361 | 49.20% | 0.0347   | 0.52 to 1.26         | 0.856239   | critically low | IV  |
| Alpha-carotene                          | WCRF 2013 | 4  | Dose-response     | per 600 µg/d                          | 284501/787  | 0.96 (0.86 to 1.07) | 0.448428 | 33.10% | 0.0043   | 0.32 to 2.86         | 0.9743947  | low            | NS  |
| Beta-cryptoxanthin                      | WCRF 2013 | 4  | Dose-response     | per 100 µg/d                          | 284501/787  | 0.97 (0.83 to 1.13) | 0.700635 | 59.10% | 0.0099   | 0.19 to 4.91         | 0.3298803  | low            | NS  |
| Lutein and<br>zeaxanthin                | WCRF 2013 | 4  | Dose-response     | per 1000 µg/d                         | 284501/787  | 0.99 (0.95 to 1.04) | 0.827912 | 0.00%  | < 0.0001 | 0.71 to 1.40         | 0.09332363 | low            | NS  |
| Lycopene                                | WCRF 2013 | 4  | Dose-response     | per 4000 µg/d                         | 284501/787  | 1.03 (0.73 to 1.47) | 0.849859 | 5.90%  | 0.0386   | 0.04 to 30.00        | 0.4098994  | low            | NS  |
| Total calcium (food<br>and supplements) | WCRF 2013 | 3  | Dose-response     | per 200 mg/d                          | NA/1711     | 0.96 (0.94 to 0.99) | 0.017337 | 0.00%  | < 0.0001 | 0.78 to 1.19         | 0.4005484  | low            | IV  |
| Dietary calcium                         | WCRF 2013 | 3  | Dose-response     | per 200 mg/d                          | NA/1574     | 0.98 (0.90 to 1.06) | 0.614121 | 0.00%  | 0.002    | 0.45 to 2.12         | 0.147922   | low            | NS  |
| Calcium<br>(supplements)                | WCRF 2013 | 3  | High v low intake | higher adherence v<br>lower adherence | NA/1482     | 0.80 (0.64 to 0.99) | 0.039569 | 0.00%  | 0.0014   | NA                   | NA         | low            | IV  |

\*: summary hazard ratio extracted from published meta-analysis, no re-analysis possible; †: The association was not statistically significant after using the trim-and-fill method; #: SHR was generated by combining the hazard ratios from the 2 meta-analyses; SHR = summary hazard ratio;

NA = not available; NS = not-significant; PI = prediction intervals; ASB = artificially sweetened beverages; SSB = sugar-sweetened beverages.

**Table S9: Summary of results of the associations on various dietary factors and risk of RCC by study design**

| Exposure                                        | No. of primary studies | No. of participants / No. of cases | Adjusted SHR (95%-CI) | p-value  | I <sup>2</sup> | 95%-PI        | SSE | LSS | ESB | CE  |
|-------------------------------------------------|------------------------|------------------------------------|-----------------------|----------|----------------|---------------|-----|-----|-----|-----|
| <b>Dietary patterns or diet quality indices</b> |                        |                                    |                       |          |                |               |     |     |     |     |
| Healthy dietary pattern                         |                        |                                    |                       |          |                |               |     |     |     |     |
| Overall                                         | 4                      | 51709/1327                         | 0.66 (0.51 to 0.85)   | 0.00145  | 19.40%         | 0.27 to 1.63  | No  | No  | No  | IV  |
| Cc                                              | 3                      | 5137/1234                          | 0.62 (0.51 to 0.76)   | 1.8E-06  | 34.10%         | 0.03 to 13.85 | No  | No  | No  | III |
| Co                                              | 1                      | 46572/93                           | 0.81 (0.45 to 1.47)   | -        | -              | -             | -   | -   | -   | -   |
| Unhealthy/western pattern                       |                        |                                    |                       |          |                |               |     |     |     |     |
| Overall                                         | 4                      | 51709/1327                         | 1.54 (1.19 to 2.01)   | 0.001232 | 24.70%         | 0.62 to 3.84  | No  | No  | No  | IV  |
| Cc                                              | 3                      | 5137/1234                          | 1.61 (1.33 to 1.95)   | 9E-07    | 40.30%         | 0.09 to 26.81 | No  | No  | No  | III |
| Co                                              | 1                      | 46572/93                           | 1.14 (0.50 to 2.61)   | -        | -              | -             | -   | -   | -   | -   |
| Drinking pattern                                |                        |                                    |                       |          |                |               |     |     |     |     |
| Overall                                         | 2                      | 47705/554                          | 0.69 (0.47 to 1.01)   | 0.057101 | 0.00%          | NA            | NA  | No  | No  | NS  |
| Cc                                              | 1                      | 1133/461                           | 0.65 (0.37 to 1.14)   | -        | -              | -             | -   | -   | -   | -   |
| Co                                              | 1                      | 46572/93                           | 0.72 (0.42 to 1.23)   | -        | -              | -             | -   | -   | -   | -   |
| Dietary Inflammatory Index                      |                        |                                    |                       |          |                |               |     |     |     |     |
| Overall                                         | 2                      | 36118/1030                         | 1.08 (1.03 to 1.13)   | 0.00276  | 0.00%          | NA            | NA  | No  | No  | IV  |
| Co                                              | 1                      | 33817/263                          | 1.07 (0.99 to 1.15)   | -        | -              | -             | -   | -   | -   | -   |
| Cc                                              | 1                      | 2301/767                           | 1.08 (1.01 to 1.15)   | -        | -              | -             | -   | -   | -   | -   |
| Glycemic index                                  |                        |                                    |                       |          |                |               |     |     |     |     |
| Overall                                         | 5                      | 502119/4281                        | 1.18 (1.02 to 1.37)   | 0.026826 | 26.00%         | 0.79 to 1.75  | No  | No  | No  | IV  |
| Cc                                              | 3                      | 10794/2966                         | 1.26 (1.10 to 1.45)   | 0.00114  | 0.00%          | 0.39 to 4.18  | No  | No  | No  | IV  |
| Co                                              | 2                      | 491325/1315                        | 1.01 (0.85 to 1.21)   | 0.90898  | 0.00%          | NA            | NA  | No  | No  | NS  |

|               |    |               |                     |          |        |                 |     |     |    |     |
|---------------|----|---------------|---------------------|----------|--------|-----------------|-----|-----|----|-----|
| Glycemic load |    |               |                     |          |        |                 |     |     |    |     |
| Overall       | 5  | 502119/4281   | 1.16 (0.73 to 1.84) | 0.522525 | 82.40% | 0.21 to 6.45    | No  | No  | No | NS  |
| Cc            | 3  | 10794/2966    | 1.45 (0.86 to 2.46) | 0.16306  | 87.60% | 0.002 to 997.33 | No  | No  | No | NS  |
| Co            | 2  | 491325/1315   | 0.89 (0.66 to 1.21) | 0.45501  | 47.70% | NA              | NA  | No  | No | NS  |
| <b>Foods</b>  |    |               |                     |          |        |                 |     |     |    |     |
| Fish          |    |               |                     |          |        |                 |     |     |    |     |
| Overall       | 15 | 608753/9324   | 0.97 (0.84 to 1.10) | 0.612245 | 24.10% | 0.63 to 1.47    | No  | No  | No | NS  |
| Cc            | 12 | 33532/6881    | 0.95 (0.86 to 1.05) | 0.2913   | 0.00%  | 0.62 to 1.42    | No  | No  | No | NS  |
| Co            | 3  | 580730/2443   | 1.06 (0.78 to 1.46) | 0.70129  | 61.60% | 0.03 to 38.91   | No  | No  | No | NS  |
| All meat      |    |               |                     |          |        |                 |     |     |    |     |
| Overall (Cc)  | 11 | 15237/4835    | 1.27 (1.08 to 1.49) | 0.003529 | 0.00%  | 0.83 to 1.94    | No  | No  | No | IV  |
| seafood*      |    |               |                     |          |        |                 |     |     |    |     |
| Overall (Co)  | 12 | NA/1375       | 1.05 (0.82 to 1.35) | -        | -      | -               | -   | -   | -  | -   |
| Vegetables    |    |               |                     |          |        |                 |     |     |    |     |
| Overall       | 16 | 1365634/9353  | 0.74 (0.63 to 0.86) | 0.000073 | 51.30% | 0.44 to 1.23    | Yes | Yes | No | III |
| Co            | 3  | 1344053/3543  | 0.89 (0.80 to 0.99) | 0.025432 | 42.30% | 0.19 to 3.99    | No  | Yes | No | IV  |
| Cc            | 13 | 21968/6197    | 0.70 (0.63 to 0.79) | 9.18E-10 | 36.10% | 0.40 to 1.22    | No  | Yes | No | II  |
| Fruits        |    |               |                     |          |        |                 |     |     |    |     |
| Overall       | 17 | 1398778/9150  | 0.84 (0.69 to 1.02) | 0.075352 | 50.90% | 0.39 to 1.78    | No  | Yes | No | NS  |
| Co            | 4  | 1378251/NA    | 0.92 (0.81 to 1.04) | 0.166174 | 46.80% | 0.07 to 9.64    | No  | Yes | No | NS  |
| Cc            | 13 | 20527/5593    | 0.83 (0.67 to 1.03) | 0.092835 | 54.60% | 0.40 to 1.73    | No  | Yes | No | NS  |
| Red meat      |    |               |                     |          |        |                 |     |     |    |     |
| Overall       | 19 | 1826171/12631 | 1.40 (1.15 to 1.70) | 0.000807 | 71.40% | 0.63 to 3.13    | Yes | No  | No | III |
| Co            | 5  | 1791359/4047  | 1.07 (0.96 to 1.19) | 0.229841 | 1.50%  | 0.69 to 1.80    | No  | No  | No | NS  |
| Cc            | 14 | 34812/8584    | 1.50 (1.16 to 1.93) | 0.001841 | 75.00% | 0.57 to 3.92    | Yes | No  | No | IV  |

|                                  |    |               |                      |          |        |               |     |     |    |     |
|----------------------------------|----|---------------|----------------------|----------|--------|---------------|-----|-----|----|-----|
| Processed meat                   |    |               |                      |          |        |               |     |     |    |     |
| Overall                          | 19 | 1793675/14240 | 1.13 (1.01 to 1.26)  | 0.030876 | 46.80% | 0.78 to 1.64  | No  | No  | No | IV  |
| Co                               | 4  | 1757161/4033  | 1.11 (0.99 to 1.25)  | 0.076356 | 0.00%  | 0.71 to 1.76  | No  | No  | No | NS  |
| Cc                               | 15 | 36514/10207   | 1.12 (0.98 to 1.28)  | 0.08463  | 57.00% | 0.73 to 1.73  | No  | Yes | No | NS  |
| Poultry                          |    |               |                      |          |        |               |     |     |    |     |
| Overall                          | 16 | NA/4165       | 1.23 (1.02 to 1.47)  | 0.030824 | 0.00%  | 0.88 to 1.70  | No  | No  | No | IV  |
| Co                               | 11 | 682016/1348   | 1.25 (0.83 to 1.88)  | -        | -      | -             | -   | -   | -  | -   |
| Cc                               | 5  | 10805/3168    | 1.22 (1.002 to 1.48) | 0.047485 | 0.00%  | 0.79 to 1.88  | No  | No  | No | IV  |
| Cruciferous vegetables           |    |               |                      |          |        |               |     |     |    |     |
| Overall                          | 12 | 1228518/5773  | 0.81 (0.71 to 0.92)  | 0.001107 | 55.70% | 0.54 to 1.20  | No  | Yes | No | IV  |
| Co                               | 6  | 1213193/1347  | 0.92 (0.84 to 1.003) | 0.05848  | 37.40% | 0.56 to 1.47  | No  | Yes | No | NS  |
| Cc                               | 6  | 15325/4426    | 0.72 (0.64 to 0.81)  | 1.8E-08  | 18.80% | 0.48 to 1.09  | No  | No  | No | III |
| Fruit and non-starchy vegetables |    |               |                      |          |        |               |     |     |    |     |
| Overall (Co)                     | 7  | 756544/1215   | 0.99 (0.93 to 1.05)  | 0.748236 | 0.00%  | 0.85 to 1.15  | Yes | No  | No | NS  |
| Non-starchy vegetables           |    |               |                      |          |        |               |     |     |    |     |
| Overall (Co)                     | 8  | 1248385/3031  | 0.99 (0.91 to 1.09)  | 0.942029 | 0.00%  | 0.80 to 1.24  | No  | No  | No | NS  |
| Tomatoes                         |    |               |                      |          |        |               |     |     |    |     |
| Overall (Co)                     | 3  | NA/427        | 1.11 (0.92 to 1.35)  | 0.28285  | 0.00%  | 0.27 to 4.51  | No  | No  | No | NS  |
| Citrus fruit                     |    |               |                      |          |        |               |     |     |    |     |
| Overall (Co)                     | 7  | NA/2735       | 0.98 (0.90 to 1.05)  | 0.53534  | 0.00%  | 0.80 to 1.19  | No  | Yes | No | NS  |
| <b>Beverages</b>                 |    |               |                      |          |        |               |     |     |    |     |
| Sweetened carbonated beverage    |    |               |                      |          |        |               |     |     |    |     |
| Overall                          | 5  | NA/NA         | 1.35 (0.86 to 2.11)  | 0.187219 | 60.10% | 0.28 to 6.51  | No  | NA  | No | NS  |
| Cc                               | 4  | NA/NA         | 1.44 (0.81 to 2.56)  | 0.21376  | 64.00% | 0.12 to 17.94 | No  | No  | No | NS  |
| Co                               | 1  | NA/NA         | 1.11 (0.89 to 1.38)  | -        | -      | -             | -   | -   | -  | -   |





|                       |    |              |                       |          |        |              |    |     |    |     |
|-----------------------|----|--------------|-----------------------|----------|--------|--------------|----|-----|----|-----|
| Overall (Co)          | 14 | 1210245/1985 | 1.05 (0.88 to 1.24)   | 0.60759  | 41.30% | NA           | NA | No  | No | NS  |
| Monounsaturated fat   |    |              |                       |          |        |              |    |     |    |     |
| Overall (Co)          | 14 | 1210245/1985 | 0.98 (0.83 to 1.15)   | 0.76247  | 0.00%  | NA           | NA | No  | No | NS  |
| Polyunsaturated fat   |    |              |                       |          |        |              |    |     |    |     |
| Overall (Co)          | 14 | 1210245/1985 | 0.90 (0.75 to 1.07)   | 0.21982  | 18.90% | NA           | NA | No  | No | NS  |
| Animal fat*           |    |              |                       |          |        |              |    |     |    |     |
| Overall (Co)          | 8  | 417093/900   | 1.01 (0.96 to 1.07)   | -        | -      | -            | -  | -   | -  | -   |
| Plant fat*            |    |              |                       |          |        |              |    |     |    |     |
| Overall (Co)          | 8  | 417093/900   | 0.99 (0.93 to 1.05)   | -        | -      | -            | -  | -   | -  | -   |
| Cholesterol*          |    |              |                       |          |        |              |    |     |    |     |
| Overall (Co)          | 13 | 774952/1478  | 1.03 (0.94 to 1.14)   | -        | -      | -            | -  | -   | -  | -   |
| Total protein         |    |              |                       |          |        |              |    |     |    |     |
| Overall (Co)          | 14 | 1210245/1985 | 1.08 (0.99 to 1.19)   | 0.09981  | 0.00%  | NA           | NA | No  | No | NS  |
| Animal protein        |    |              |                       |          |        |              |    |     |    |     |
| Overall (Co)          | 14 | 1210245/1985 | 1.10 (1.0003 to 1.20) | 0.04936  | 0.00%  | NA           | NA | No  | No | IV  |
| Plant protein         |    |              |                       |          |        |              |    |     |    |     |
| Overall (Co)          | 14 | 1210245/1985 | 0.98 (0.80 to 1.22)   | 0.88739  | 0.00%  | NA           | NA | No  | No | NS  |
| Dietary fiber         |    |              |                       |          |        |              |    |     |    |     |
| Overall               | 7  | 942582/6590  | 0.82 (0.71 to 0.95)   | 0.007181 | 27.60% | 0.55 to 1.22 | No | Yes | No | IV  |
| Co                    | 2  | 927134/2323  | 0.85 (0.73 to 0.98)   | 0.024525 | 41.60% | NA           | NA | Yes | No | IV  |
| Cc                    | 5  | 15448/4267   | 0.79 (0.69 to 0.90)   | 0.000402 | 34.50% | 0.47 to 1.33 | No | Yes | No | III |
| <b>Micronutrients</b> |    |              |                       |          |        |              |    |     |    |     |
| Riboflavin            |    |              |                       |          |        |              |    |     |    |     |
| Overall               | 3  | 39789/1971   | 0.89 (0.70 to 1.13)   | 0.343247 | 0.00%  | 0.14 to 5.84 | No | No  | No | NS  |
| Co                    | 1  | 35192/62     | 0.71 (0.39 to 1.30)   | -        | -      | -            | -  | -   | -  | -   |

|              |    |             |                     |          |        |               |     |    |    |     |
|--------------|----|-------------|---------------------|----------|--------|---------------|-----|----|----|-----|
| Cc           | 2  | 4597/1909   | 0.92 (0.73 to 1.17) | 0.50215  | 0.00%  | NA            | NA  | No | No | NS  |
| Vitamin B6   | 5  |             |                     |          |        |               |     |    |    |     |
| Overall      | 5  | 164883/2407 | 0.85 (0.70 to 1.04) | 0.113403 | 0.00%  | 0.58 to 1.27  | No  | No | No | NS  |
| Cc           | 2  | 4597/1909   | 0.81 (0.64 to 1.03) | 0.08175  | 0.00%  | NA            | NA  | No | No | NS  |
| Co           | 3  | 160286/498  | 0.92 (0.70 to 1.21) | 0.53487  | 0.00%  | 0.13 to 6.35  | No  | No | No | NS  |
| Folate       |    |             |                     |          |        |               |     |    |    |     |
| Overall      | 6  | 136319/3166 | 0.84 (0.69 to 1.03) | 0.088191 | 6.00%  | 0.52 to 1.36  | No  | No | No | NS  |
| Cc           | 3  | 6747/2232   | 0.77 (0.63 to 0.95) | 0.01457  | 0.00%  | 0.08 to 7.29  | No  | No | No | IV  |
| Co           | 3  | 129074/934  | 0.97 (0.76 to 1.23) | 0.78937  | 0.00%  | 0.11 to 8.11  | Yes | No | No | NS  |
| Vitamin B12  |    |             |                     |          |        |               |     |    |    |     |
| Overall      | 3  | 127390/1578 | 1.13 (0.88 to 1.46) | 0.331795 | 0.00%  | 0.19 to 6.65  | No  | No | No | NS  |
| Cc           | 1  | 2296/1142   | 1.00 (0.68 to 1.46) | -        | -      | -             | -   | -  | -  | -   |
| Co           | 2  | 125094/436  | 1.24 (0.90 to 1.70) | 0.19407  | 0.00%  | NA            | NA  | No | No | NS  |
| Methionine   |    |             |                     |          |        |               |     |    |    |     |
| Overall (Co) | 2  | 125094/436  | 1.29 (0.90 to 1.85) | 0.170519 | 0.00%  | NA            | NA  | No | No | NS  |
| Choline      |    |             |                     |          |        |               |     |    |    |     |
| Overall (Co) | 2  | 125094/436  | 0.87 (0.63 to 1.22) | 0.433326 | 0.00%  | NA            | NA  | No | No | NS  |
| Betaine      |    |             |                     |          |        |               |     |    |    |     |
| Overall (Co) | 2  | 125094/436  | 1.01 (0.62 to 1.65) | 0.962844 | 58.80% | NA            | NA  | No | No | NS  |
| Vitamin C    |    |             |                     |          |        |               |     |    |    |     |
| Overall      | 10 | 274864/5182 | 0.77 (0.66 to 0.90) | 0.000636 | 0.00%  | 0.54 to 1.10  | No  | No | No | III |
| Cc           | 7  | 15019/4439  | 0.75 (0.66 to 0.86) | 1.3E-05  | 0.00%  | 0.59 to 0.95  | Yes | No | No | III |
| Co           | 3  | 259845/743  | 0.91 (0.69 to 1.20) | 0.48914  | 34.00% | 0.01 to 52.50 | No  | No | No | NS  |
| Vitamin D    |    |             |                     |          |        |               |     |    |    |     |
| Overall      | 6  | 187560/NA   | 0.89 (0.71 to 1.11) | 0.286865 | 36.50% | 0.49 to 1.64  | No  | No | No | NS  |



|                                      |    |             |                     |          |        |                   |     |     |    |    |
|--------------------------------------|----|-------------|---------------------|----------|--------|-------------------|-----|-----|----|----|
| Co                                   | 3  | 182756/NA   | 0.99 (0.66 to 1.50) | 0.98827  | 66.60% | 0.01 to 90.98     | No  | No  | No | NS |
| Cc                                   | 3  | 4804/1895   | 0.79 (0.65 to 0.97) | 0.02623  | 0.00%  | 0.21 to 3.07      | No  | No  | No | IV |
| Dietary nitrate                      |    |             |                     |          |        |                   |     |     |    |    |
| Overall                              | 3  | NA/NA       | 0.78 (0.40 to 1.55) | 0.482996 | 89.20% | 0.0002 to 3013.70 | No  | NA  | No | NS |
| Co                                   | 2  | NA/NA       | 0.99 (0.85 to 1.15) | 0.91048  | 0.00%  | NA                | NA  | No  | No | NS |
| Cc                                   | 1  | NA/NA       | 0.41 (0.28 to 0.60) | -        | -      | -                 | -   | -   | -  | -  |
| Dietary nitrite                      |    |             |                     |          |        |                   |     |     |    |    |
| Overall                              | 2  | NA/NA       | 0.99 (0.81 to 1.21) | 0.892113 | 0.00%  | NA                | NA  | No  | No | NS |
| Cc                                   | 1  | NA/NA       | 0.82 (0.50 to 1.34) | -        | -      | -                 | -   | -   | -  | -  |
| Co                                   | 1  | NA/NA       | 1.02 (0.87 to 1.19) | -        | -      | -                 | -   | -   | -  | -  |
| Vitamin E                            |    |             |                     |          |        |                   |     |     |    |    |
| Overall                              | 13 | 471006/6944 | 0.81 (0.69 to 0.94) | 0.006361 | 49.20% | 0.52 to 1.26      | No  | No  | No | IV |
| Cc                                   | 7  | 20543/5731  | 0.78 (0.63 to 0.96) | 0.0186   | 67.50% | 0.42 to 1.44      | No  | Yes | No | IV |
| Co                                   | 6  | 450526/1213 | 0.88 (0.72 to 1.08) | 0.226063 | 0.00%  | 0.50 to 1.50      | Yes | No  | No | NS |
| Alpha-carotene                       |    |             |                     |          |        |                   |     |     |    |    |
| Overall (Co)                         | 4  | 284501/787  | 0.96 (0.86 to 1.07) | 0.448428 | 33.10% | 0.32 to 2.86      | No  | No  | No | NS |
| Beta-cryptoxanthin                   |    |             |                     |          |        |                   |     |     |    |    |
| Overall (Co)                         | 4  | 284501/787  | 0.97 (0.83 to 1.13) | 0.700635 | 59.10% | 0.19 to 4.91      | No  | Yes | No | NS |
| Lutein and zeaxanthin                |    |             |                     |          |        |                   |     |     |    |    |
| Overall (Co)                         | 4  | 284501/787  | 0.99 (0.95 to 1.04) | 0.827912 | 0.00%  | 0.71 to 1.40      | Yes | No  | No | NS |
| Lycopene                             |    |             |                     |          |        |                   |     |     |    |    |
| Overall (Co)                         | 4  | 284501/787  | 1.03 (0.73 to 1.47) | 0.849859 | 5.90%  | 0.04 to 30.00     | No  | No  | No | NS |
| Total calcium (food and supplements) |    |             |                     |          |        |                   |     |     |    |    |
| Overall (Co)                         | 3  | NA/1711     | 0.96 (0.94 to 0.99) | 0.017337 | 0.00%  | 0.78 to 1.19      | No  | Yes | No | IV |

|                          |   |         |                     |          |       |              |    |    |    |    |
|--------------------------|---|---------|---------------------|----------|-------|--------------|----|----|----|----|
| Dietary calcium          |   |         |                     |          |       |              |    |    |    |    |
| Overall (Co)             | 3 | NA/1574 | 0.98 (0.90 to 1.06) | 0.614121 | 0.00% | 0.45 to 2.12 | No | No | No | NS |
| Calcium from supplements |   |         |                     |          |       |              |    |    |    |    |
| Overall (Co)             | 3 | NA/1482 | 0.80 (0.64 to 0.99) | 0.039569 | 0.00% | NA           | NA | No | No | IV |

CE = class of evidence; CI = confidence interval; PI = prediction interval; SSE = small study effect; ESB = excess significance bias; LSS = Largest study significant; SHR = summary hazard ratio; CC = case-control studies; Co = cohort studies; NA = not available; NS = not-significant; ASB = artificially sweetened beverages; SSB = sugar-sweetened beverages; \*: summary hazard ratio extracted from published meta-analysis, no re-analysis possible; -: Results could not be calculated because of insufficient number of studies.

**Table S10: Summary of results of the associations on various dietary factors and risk of RCC by region**

| Exposure                                        | No. of primary studies | No. of participants / No. of cases | Adjusted SHR (95% CI) | p-value         | I <sup>2</sup> | 95%-PI        | SSE | LSS | ESB | CE  |
|-------------------------------------------------|------------------------|------------------------------------|-----------------------|-----------------|----------------|---------------|-----|-----|-----|-----|
| <b>Dietary patterns or diet quality indices</b> |                        |                                    |                       |                 |                |               |     |     |     |     |
| Healthy dietary pattern                         |                        |                                    |                       |                 |                |               |     |     |     |     |
| Overall                                         | 4                      | 51709/1327                         | 0.66 (0.51 to 0.85)   | 0.001449        | 19.40%         | 0.27 to 1.63  | No  | No  | No  | IV  |
| America                                         | 3                      | 5137/1234                          | 0.62 (0.51 to 0.76)   | 0.000002        | 34.10%         | 0.03 to 13.85 | No  | No  | No  | III |
| Europe                                          | 1                      | 46572/93                           | 0.81 (0.45 to 1.47)   | -               | -              | -             | -   | -   | -   | -   |
| Unhealthy/western pattern                       |                        |                                    |                       |                 |                |               |     |     |     |     |
| Overall                                         | 4                      | 51709/1327                         | 1.54 (1.19 to 2.01)   | 0.001232        | 24.70%         | 0.62 to 3.84  | No  | No  | No  | IV  |
| America                                         | 3                      | 5137/1234                          | 1.61 (1.33 to 1.95)   | 0.0000009<br>02 | 40.30%         | 0.09 to 26.81 | No  | No  | No  | III |
| Europe                                          | 1                      | 46572/93                           | 1.14 (0.50 to 2.61)   | -               | -              | -             | -   | -   | -   | -   |
| Drinking pattern                                |                        |                                    |                       |                 |                |               |     |     |     |     |
| Overall                                         | 2                      | 47705/554                          | 0.69 (0.47 to 1.01)   | 0.057101        | 0.00%          | NA            | NA  | No  | No  | NS  |
| North America                                   | 1                      | 1133/461                           | 0.65 (0.37 to 1.14)   | -               | -              | -             | -   | -   | -   | -   |
| Europe                                          | 1                      | 46572/93                           | 0.72 (0.42 to 1.23)   | -               | -              | -             | -   | -   | -   | -   |
| Dietary Inflammatory Index                      |                        |                                    |                       |                 |                |               |     |     |     |     |
| Overall                                         | 2                      | 36118/1030                         | 1.08 (1.03 to 1.13)   | 0.00276         | 0.00%          | NA            | NA  | No  | No  | IV  |
| North America                                   | 1                      | 33817/263                          | 1.07 (0.99 to 1.15)   | -               | -              | -             | -   | -   | -   | -   |
| Europe                                          | 1                      | 2301/767                           | 1.08 (1.01 to 1.15)   | -               | -              | -             | -   | -   | -   | -   |
| Glycemic index                                  |                        |                                    |                       |                 |                |               |     |     |     |     |
| Overall                                         | 5                      | 502119/4281                        | 1.18 (1.02 to 1.37)   | 0.026826        | 26.00%         | 0.80 to 1.75  | No  | No  | No  | IV  |
| North America                                   | 3                      | 454670/3378                        | 1.12 (0.99 to 1.26)   | 0.066159        | 39.70%         | 0.20 to 6.45  | No  | No  | No  | NS  |

|               |    |              |                     |           |        |              |     |     |    |     |
|---------------|----|--------------|---------------------|-----------|--------|--------------|-----|-----|----|-----|
| Europe        | 2  | 47449/903    | 1.36 (1.04 to 1.77) | 0.022337  | 0.00%  | NA           | NA  | No  | No | IV  |
| Glycemic load |    |              |                     |           |        |              |     |     |    |     |
| Overall       | 5  | 502119/4281  | 1.16 (0.73 to 1.84) | 0.522525  | 82.40% | 0.21 to 6.45 | No  | No  | No | NS  |
| North America | 3  | 454670/3378  | 1.08 (0.93 to 1.27) | 0.317567  | 0.00%  | 0.35 to 3.35 | No  | No  | No | NS  |
| Europe        | 2  | 47449/903    | 1.22 (0.28 to 5.37) | 0.788034  | 92.20% | NA           | NA  | No  | No | NS  |
| <b>Foods</b>  |    |              |                     |           |        |              |     |     |    |     |
| Fish          |    |              |                     |           |        |              |     |     |    |     |
| Overall       | 15 | 608753/9324  | 0.97 (0.84 to 1.10) | 0.612245  | 24.10% | 0.63 to 1.47 | No  | No  | No | NS  |
| North America | 4  | 502412/4338  | 1.06 (0.94 to 1.19) | 0.353153  | 0.00%  | 0.46 to 2.41 | No  | No  | No | NS  |
| Europe        | 9  | 107489/3647  | 0.98 (0.86 to 1.10) | 0.703011  | 9.20%  | 0.69 to 1.37 | No  | No  | No | NS  |
| Australia     | 1  | 3896/1185    | 0.89 (0.70 to 1.13) | -         | -      | -            | -   | -   | -  | -   |
| Asia          | 1  | 465/154      | 0.48 (0.25 to 0.93) | -         | -      | -            | -   | -   | -  | -   |
| All meat      |    |              |                     |           |        |              |     |     |    |     |
| Overall       | 11 | 15237/4835   | 1.27 (1.08 to 1.49) | 0.003529  | 0.00%  | 0.83 to 1.94 | No  | No  | No | IV  |
| Europe        | 5  | 3579/1385    | 1.12 (0.90 to 1.40) | 0.2971    | 0.00%  | 0.64 to 2.01 | No  | No  | No | NS  |
| North America | 5  | 11347/3296   | 1.27 (1.13 to 1.43) | 0.000073  | 0.00%  | 0.88 to 1.87 | No  | No  | No | III |
| Asia          | 1  | 311/154      | 2.34 (1.10 to 5.00) | -         | -      | -            | -   | -   | -  | -   |
| Seafood*      |    |              |                     |           |        |              |     |     |    |     |
| Overall       | 12 | NA/1375      | 1.05 (0.82 to 1.35) | -         | -      | -            | -   | -   | -  | -   |
| Vegetables    |    |              |                     |           |        |              |     |     |    |     |
| Overall       | 16 | 1365634/9353 | 0.74 (0.63 to 0.86) | 0.000073  | 51.30% | 0.44 to 1.23 | Yes | Yes | No | III |
| America       | 6  | 573684/3534  | 0.71 (0.53 to 0.95) | 0.022256  | 69.20% | 0.29 to 1.77 | Yes | No  | No | IV  |
| International | 2  | 777663/2663  | 0.80 (0.69 to 0.93) | 0.003834  | 0.00%  | NA           | NA  | Yes | No | IV  |
| Europe        | 7  | 14363/3389   | 0.70 (0.60 to 0.81) | 0.0000013 | 35.10% | 0.36 to 1.46 | No  | Yes | No | III |
| Asia          | 1  | 311/154      | 0.65 (0.32 to 1.31) | -         | -      | -            | -   | -   | -  | -   |



|                                  |    |              |                     |                |        |                  |     |     |    |    |
|----------------------------------|----|--------------|---------------------|----------------|--------|------------------|-----|-----|----|----|
| Overall                          | 12 | 1228518/5773 | 0.81 (0.71 to 0.92) | 0.001107       | 55.70% | 0.54 to 1.20     | No  | Yes | No | IV |
| North America                    | 6  | 640450/3557  | 0.78 (0.70 to 0.86) | 0.0000006<br>8 | 27.30% | 0.51 to 1.13     | No  | Yes | No | II |
| Europe                           | 6  | 588068/2216  | 0.87 (0.71 to 1.07) | 0.181607       | 63.20% | 0.48 to 1.58     | No  | No  | No | NS |
| Fruit and non-starchy vegetables |    |              |                     |                |        |                  |     |     |    |    |
| Overall                          | 7  | 756544/1215  | 0.99 (0.93 to 1.05) | 0.748236       | 0.00%  | 0.85 to 1.15     | Yes | No  | No | NS |
| Europe                           | 4  | 584765/958   | 0.99 (0.94 to 1.05) | 0.760772       | 0.00%  | 0.86 to 1.14     | No  | No  | No | NS |
| USA                              | 2  | 171779/310   | 1.02 (0.85 to 1.23) | 0.853945       | 70.70% | NA               | NA  | No  | No | NS |
| Non-starchy vegetables           |    |              |                     |                |        |                  |     |     |    |    |
| Overall                          | 8  | 1248385/3031 | 0.99 (0.91 to 1.09) | 0.942029       | 0.00%  | 0.80 to 1.24     | No  | No  | No | NS |
| USA                              | 3  | 663620/2126  | 0.99 (0.96 to 1.02) | 0.511724       | 44.30% | 0.19 to 5.19     | No  | No  | No | NS |
| Europe                           | 4  | 584765/958   | 1.01 (0.90 to 1.14) | 0.83671        | 0.00%  | 0.70 to 1.46     | No  | No  | No | NS |
| Tomatoes                         |    |              |                     |                |        |                  |     |     |    |    |
| Overall                          | 3  | NA/427       | 1.11 (0.92 to 1.35) | 0.28285        | 0.00%  | 0.27 to 4.51     | No  | No  | No | NS |
| Asia                             | 1  | NA/56        | 1.19 (0.43 to 3.32) | -              | -      | -                | -   | -   | -  | -  |
| Europe                           | 2  | 181852/397   | 1.11 (0.92 to 1.33) | 0.278029       | 0.00%  | NA               | NA  | No  | No | NS |
| Citrus fruit                     |    |              |                     |                |        |                  |     |     |    |    |
| Overall                          | 7  | NA/2735      | 0.98 (0.90 to 1.05) | 0.53534        | 0.00%  | 0.80 to 1.19     | No  | Yes | No | NS |
| USA                              | 2  | 628428/2064  | 0.96 (0.93 to 0.99) | 0.025052       | 0.00%  | NA               | NA  | Yes | No | IV |
| Europe                           | 3  | 208914/652   | 1.01 (0.93 to 1.10) | 0.785659       | 0.00%  | 0.42 to 2.40     | No  | No  | No | NS |
| Asia                             | 1  | NA/62        | 0.65 (0.18 to 2.38) | -              | -      | -                | -   | -   | -  | -  |
| <b>Beverages</b>                 |    |              |                     |                |        |                  |     |     |    |    |
| Sweetened carbonated beverage    |    |              |                     |                |        |                  |     |     |    |    |
| Overall                          | 5  | NA/NA        | 1.35 (0.86 to 2.11) | 0.187219       | 60.10% | 0.28 to 6.51     | No  | NA  | No | NS |
| North America                    | 3  | NA/NA        | 1.64 (0.92 to 2.92) | 0.091794       | 70.20% | 0.002 to 1575.77 | No  | No  | No | NS |



|                      |   |              |                      |          |        |                         |    |     |     |     |
|----------------------|---|--------------|----------------------|----------|--------|-------------------------|----|-----|-----|-----|
| Overall              | 8 | NA/5538      | 0.70 (0.52 to 0.94)  | 0.019297 | 56.00% | 0.29 to 1.70            | No | Yes | No  | IV  |
| North America        | 5 | NA/2173      | 0.78 (0.64 to 0.94)  | 0.009045 | 0.00%  | 0.47 to 1.33            | No | Yes | No  | IV  |
| International        | 1 | NA/1185      | 0.33 (0.20 to 0.53)  |          | -      | -                       | -  | -   | -   | -   |
| Europe               | 2 | NA/2180      | 0.71 (0.35 to 1.44)  | 0.343396 | 58.90% | NA                      | NA | Yes | No  | NS  |
| Spirits              |   |              |                      |          |        |                         |    |     |     |     |
| Overall              | 9 | NA/6393      | 0.80 (0.64 to 0.99)  | 0.048382 | 74.30% | 0.39 to 1.62            | No | Yes | No  | IV  |
| North America        | 5 | NA/2173      | 0.90 (0.77 to 1.06)  | 0.202098 | 14.00% | 0.50 to 1.69            | No | No  | No  | NS  |
| International        | 1 | NA/1185      | 0.46 (0.37 to 0.58)  | -        | -      | -                       | -  | -   | -   | -   |
| Europe               | 3 | NA/3035      | 0.84 (0.71 to 0.99)  | 0.040466 | 21.30% | 0.03 to 24.37           | No | No  | No  | IV  |
| Alcohol(light)       |   |              |                      |          |        |                         |    |     |     |     |
| Overall              | 6 | 3720850/5214 | 0.91 (0.81 to 1.02)  | 0.102662 | 39.60% | 0.64 to 1.28            | No | No  | No  | NS  |
| Europe/North America | 5 | 2801651/5140 | 0.94 (0.88 to 1.002) | 0.059057 | 38.40% | 0.70 to 1.22            | No | No  | No  | NS  |
| Asia                 | 1 | 919199/74    | 0.63 (0.35 to 1.13)  | -        | -      | -                       | -  | -   | -   | -   |
| Alcohol(moderate)    |   |              |                      |          |        |                         |    |     |     |     |
| Overall              | 8 | 4139301/5364 | 0.77 (0.58 to 1.02)  | 0.069063 | 29.20% | 0.30 to 1.98            | No | Yes | No  | NS  |
| Europe/North America | 6 | 2792947/5262 | 0.77 (0.70 to 0.84)  | 2.20E-09 | 0.00%  | 0.61 to 0.97            | No | Yes | No  | I   |
| Asia                 | 2 | 1346354/102  | 1.06 (0.19 to 5.90)  | 0.946316 | 84.30% | NA                      | NA | Yes | Yes | NS  |
| Alcohol(heavy)       |   |              |                      |          |        |                         |    |     |     |     |
| Overall              | 3 | 2065995/363  | 0.93 (0.27 to 3.23)  | 0.9134   | 81.20% | 0.0000 to<br>3904180.81 | No | Yes | Yes | NS  |
| North America        | 1 | 77260/249    | 0.69 (0.43 to 1.11)  | -        | -      | -                       | -  | -   | -   | -   |
| Asia                 | 2 | 1988735/114  | 1.16 (0.14 to 9.43)  | 0.892975 | 90.60% | NA                      | NA | Yes | Yes | NS  |
| Alcohol(any)         |   |              |                      |          |        |                         |    |     |     |     |
| Overall              | 8 | 4867646/5503 | 0.88 (0.63 to 1.22)  | 0.439292 | 62.90% | 0.27 to 2.81            | No | Yes | Yes | NS  |
| Europe/North America | 6 | 2878911/5389 | 0.89 (0.83 to 0.94)  | 0.000181 | 12.10% | 0.72 to 1.07            | No | Yes | Yes | III |





|                                |    |              |                      |          |        |    |    |    |    |    |
|--------------------------------|----|--------------|----------------------|----------|--------|----|----|----|----|----|
| Overall                        | 14 | 1210245/1985 | 0.98 (0.83 to 1.15)  | 0.762472 | 0.00%  | NA | NA | No | No | NS |
| International                  | 13 | 774952/1478  | 0.95 (0.82 to 1.11)  | -        | -      | -  | -  | -  | -  | -  |
| Europe                         | 1  | 435293/507   | 1.10 (0.76 to 1.59)  | -        | -      | -  | -  | -  | -  | -  |
| Polyunsaturated fat            |    |              |                      |          |        |    |    |    |    |    |
| Overall                        | 14 | 1210245/1985 | 0.90 (0.75 to 1.07)  | 0.219824 | 18.90% | NA | NA | No | No | NS |
| International                  | 13 | 774952/1478  | 0.95 (0.82 to 1.11)  | -        | -      | -  | -  | -  | -  | -  |
| Europe                         | 1  | 435293/507   | 0.80 (0.62 to 1.04)  | -        | -      | -  | -  | -  | -  | -  |
| Animal fat*                    |    |              |                      |          |        |    |    |    |    |    |
| Overall (Europe/North America) | 8  | 417093/900   | 1.01 (0.96 to 1.07)  | -        | -      | -  | -  | -  | -  | -  |
| Plant fat*                     |    |              |                      |          |        |    |    |    |    |    |
| Overall (Europe/North America) | 8  | 417093/900   | 0.99 (0.93 to 1.05)  | -        | -      | -  | -  | -  | -  | -  |
| Cholesterol*                   |    |              |                      |          |        |    |    |    |    |    |
| Overall (International)        | 13 | 774952/1478  | 1.03 (0.94 to 1.14)  | -        | -      | -  | -  | -  | -  | -  |
| Total protein                  |    |              |                      |          |        |    |    |    |    |    |
| Overall                        | 14 | 1210245/1985 | 1.08 (0.99 to 1.19)  | 0.099809 | 0.00%  | NA | NA | No | No | NS |
| International                  | 13 | 774952/1478  | 1.07 (0.97 to 1.18)  | -        | -      | -  | -  | -  | -  | -  |
| Europe                         | 1  | 435293/507   | 1.15 (0.90 to 1.47)  | -        | -      | -  | -  | -  | -  | -  |
| Animal protein                 |    |              |                      |          |        |    |    |    |    |    |
| Overall                        | 14 | 1210245/1985 | 1.10 (1.0003 to 1.2) | 0.049362 | 0.00%  | NA | NA | No | No | IV |
| International                  | 13 | 774952/1478  | 1.09 (0.98 to 1.21)  | -        | -      | -  | -  | -  | -  | -  |
| Europe                         | 1  | 435293/507   | 1.12 (0.93 to 1.35)  | -        | -      | -  | -  | -  | -  | -  |
| Plant protein                  |    |              |                      |          |        |    |    |    |    |    |
| Overall                        | 14 | 1210245/1985 | 0.98 (0.80 to 1.22)  | 0.887389 | 0.00%  | NA | NA | No | No | NS |
| International                  | 13 | 774952/1478  | 0.99 (0.73 to 1.34)  | -        | -      | -  | -  | -  | -  | -  |
| Europe                         | 1  | 435293/507   | 0.98 (0.73 to 1.32)  | -        | -      | -  | -  | -  | -  | -  |



|                         |    |             |                     |          |        |                      |    |     |    |     |
|-------------------------|----|-------------|---------------------|----------|--------|----------------------|----|-----|----|-----|
| Overall (North America) | 2  | 125094/436  | 1.01 (0.62 to 1.65) | 0.962844 | 58.80% | NA                   | NA | No  | No | NS  |
| Vitamin C               |    |             |                     |          |        |                      |    |     |    |     |
| Overall                 | 10 | 274864/5182 | 0.77 (0.66 to 0.90) | 0.000636 | 0.00%  | 0.54 to 1.10         | No | No  | No | III |
| North America           | 6  | 270580/3408 | 0.82 (0.71 to 0.94) | 0.005387 | 0.00%  | 0.49 to 1.36         | No | No  | No | IV  |
| Europe                  | 4  | 4284/1774   | 0.70 (0.57 to 0.86) | 0.000567 | 0.00%  | 0.41 to 1.18         | No | Yes | No | III |
| Vitamin D               |    |             |                     |          |        |                      |    |     |    |     |
| Overall                 | 6  | 187560/NA   | 0.89 (0.71 to 1.11) | 0.286865 | 36.50% | 0.48 to 1.64         | No | No  | No | NS  |
| North America           | 2  | 153623/NA   | 0.81 (0.61 to 1.06) | 0.121077 | 0.00%  | NA                   | NA | No  | No | NS  |
| Europe                  | 4  | 33937/NA    | 0.93 (0.68 to 1.27) | 0.654477 | 59.80% | 0.26 to 3.35         | No | No  | No | NS  |
| Dietary nitrate         |    |             |                     |          |        |                      |    |     |    |     |
| Overall (North America) | 3  | NA/NA       | 0.78 (0.40 to 1.55) | 0.482996 | 89.20% | 0.0002 to<br>3013.70 | No | NA  | No | NS  |
| Dietary nitrite         |    |             |                     |          |        |                      |    |     |    |     |
| Overall (North America) | 2  | NA/NA       | 0.99 (0.81 to 1.21) | 0.892113 | 0.00%  | NA                   | NA | No  | No | NS  |
| Vitamin E               |    |             |                     |          |        |                      |    |     |    |     |
| Overall                 | 13 | 471006/6944 | 0.81 (0.69 to 0.94) | 0.006361 | 49.20% | 0.52 to 1.26         | No | No  | No | IV  |
| North America           | 7  | 316723/3723 | 0.82 (0.67 to 1.02) | 0.068931 | 53.00% | 0.48 to 1.41         | No | No  | No | NS  |
| Europe                  | 5  | 151635/2036 | 0.77 (0.58 to 1.01) | 0.062495 | 58.00% | 0.32 to 1.82         | No | No  | No | NS  |
| International           | 1  | 2711/1185   | 0.90 (0.69 to 1.18) | -        | -      | -                    | -  | -   | -  | -   |
| Alpha-carotene          |    |             |                     |          |        |                      |    |     |    |     |
| Overall                 | 4  | 284501/787  | 0.96 (0.86 to 1.07) | 0.448428 | 33.10% | 0.32 to 2.86         | No | No  | No | NS  |
| Europe                  | 2  | 147914/539  | 0.99 (0.90 to 1.08) | 0.79312  | 34.30% | NA                   | NA | No  | No | NS  |
| USA                     | 1  | 136587/248  | 0.88 (0.76 to 1.03) | -        | -      | -                    | -  | -   | -  | -   |
| Beta-cryptoxanthin      |    |             |                     |          |        |                      |    |     |    |     |
| Overall                 | 4  | 284501/787  | 0.97 (0.83 to 1.13) | 0.700635 | 59.10% | 0.19 to 4.91         | No | Yes | No | NS  |

|                                      |   |            |                     |          |        |               |     |     |    |    |
|--------------------------------------|---|------------|---------------------|----------|--------|---------------|-----|-----|----|----|
| Europe                               | 2 | 147914/539 | 1.06 (0.99 to 1.12) | 0.05436  | 0.00%  | NA            | NA  | Yes | No | NS |
| USA                                  | 1 | 136587/248 | 0.83 (0.66 to 1.04) | -        | -      | -             | -   | -   | -  | -  |
| Lutein and zeaxanthin                |   |            |                     |          |        |               |     |     |    |    |
| Overall                              | 4 | 284501/787 | 0.99 (0.95 to 1.04) | 0.827912 | 0.00%  | 0.71 to 1.40  | Yes | No  | No | NS |
| Europe                               | 2 | 147914/539 | 1.02 (0.93 to 1.11) | 0.727552 | 0.00%  | NA            | NA  | No  | No | NS |
| USA                                  | 1 | 136587/248 | 0.99 (0.93 to 1.04) | -        | -      | -             | -   | -   | -  | -  |
| Lycopene                             |   |            |                     |          |        |               |     |     |    |    |
| Overall                              | 4 | 284501/787 | 1.03 (0.73 to 1.47) | 0.849859 | 5.90%  | 0.04 to 30.00 | No  | No  | No | NS |
| Europe                               | 2 | 147914/539 | 1.46 (0.75 to 2.84) | 0.260221 | 0.00%  | NA            | NA  | No  | No | NS |
| USA                                  | 1 | 136587/248 | 0.93 (0.84 to 1.03) | -        | -      | -             | -   | -   | -  | -  |
| Total calcium (food and supplements) |   |            |                     |          |        |               |     |     |    |    |
| Overall                              | 3 | NA/1711    | 0.96 (0.94 to 0.99) | 0.017337 | 0.00%  | 0.78 to 1.19  | No  | Yes | No | IV |
| USA                                  | 2 | NA/1482    | 0.97 (0.94 to 0.99) | 0.016165 | 0.00%  | NA            | NA  | NA  | No | IV |
| Europe                               | 1 | 27111/229  | 0.95 (0.83 to 1.09) | -        | -      | -             | -   | -   | -  | -  |
| Dietary calcium                      |   |            |                     |          |        |               |     |     |    |    |
| Overall                              | 3 | NA/1574    | 0.98 (0.90 to 1.06) | 0.614121 | 0.00%  | 0.45 to 2.11  | No  | No  | No | NS |
| Europe                               | 1 | 30000/154  | 1.00 (0.92 to 1.09) | -        | -      | -             | -   | -   | -  | -  |
| USA                                  | 2 | NA/1420    | 0.97 (0.89 to 1.06) | 0.50852  | 31.70% | NA            | NA  | NA  | No | NS |
| Calcium from supplements             |   |            |                     |          |        |               |     |     |    |    |
| Overall (USA)                        | 3 | NA/1482    | 0.80 (0.64 to 0.99) | 0.039569 | 0.00%  | NA            | NA  | No  | No | IV |

CE = class of evidence; CI = confidence interval; PI = prediction interval; SSE = small study effect; ESB = excess significance bias; LSS - Largest study significant; SHR = summary hazard ratio; International = Europe/North America/Australia; NA = not available; NS = not-significant; ASB = artificially sweetened beverages; SSB = sugar-sweetened beverages; \*: summary hazard ratio extracted from published meta-analysis, no re-analysis possible; -: Results could not be calculated because of insufficient number of studies.

**Table S11: Sensitivity analysis and the level of evidence of the association of vegetables and vitamin C with RCC.**

| Exposure   |                           | No of primary studies | No. of participants / No. of cases | Adjusted SHR (95%-CI) | p-value  | I <sup>2</sup> | 95%-PI       | SSE | ESB | LSS | CES |
|------------|---------------------------|-----------------------|------------------------------------|-----------------------|----------|----------------|--------------|-----|-----|-----|-----|
| Vegetables | full analysis             | 16                    | 1365634/9353                       | 0.74 (0.63 to 0.86)   | 0.000073 | 51.30%         | 0.44 to 1.23 | Yes | No  | Yes | III |
|            | minus small-sized studies | 13                    | 1364783/9188                       | 0.75 (0.64 to 0.89)   | 0.000807 | 56.60%         | 0.43 to 1.31 | No  | No  | Yes | III |
|            | minus low-quality studies | 14                    | 1364553/9223                       | 0.72 (0.61 to 0.84)   | 0.000024 | 53.80%         | 0.44 to 1.17 | Yes | No  | Yes | III |
| Vitamin C  | full analysis             | 10                    | 274864/5182                        | 0.77 (0.66 to 0.90)   | 0.000636 | 0.00%          | 0.54 to 1.10 | No  | No  | No  | III |
|            | minus small-sized studies | 7                     | 272881/4175                        | 0.80 (0.67 to 0.95)   | 0.009711 | 0.00%          | 0.52 to 1.22 | No  | No  | No  | IV  |
|            | minus low-quality studies | NC                    | NC                                 | NC                    | NC       | NC             | NC           | NC  | NC  | NC  | NC  |

CI – confidence interval, PI – prediction interval, SSE – small study effect, ESB – excess significance bias, LSS – Largest study significant, CES – class of evidence after sensitivity analysis, NC – not calculable because the quality of individual studies included in the meta-analysis was not available.
